# Supplementary material for: Causal Pathways from Blood Pressure to Larger QRS Amplitudes: a Mendelian Randomization Study
Source: PubMed Central journal article supplement (PMC5895613; doi:10.1038/s41598-018-24002-0), 2018-04-11
Supplement: 41598_2018_24002_MOESM1_ESM.pdf [file 41598_2018_24002_MOESM1_ESM.pdf]

# Causal Pathways from Blood Pressure to Larger QRS Amplitudes: a Mendelian Randomization Study

M. Yldau VAN DER ENDE BSc<sup>a</sup>, Tom HENDRIKS M.D.<sup>a</sup>, Dirk J. VAN VELDHUISEN, M.D., PhD.<sup>a</sup>,  
Harold SNIEDER, Ph.D.<sup>b</sup>, Niek VERWEIJ, Ph.D.<sup>a</sup>, Pim VAN DER HARST, M.D., Ph.D.<sup>a</sup>

*Author Affiliations:* <sup>a</sup>From the University of Groningen, University Medical Center Groningen, The department of Cardiology, Groningen, The Netherlands. <sup>b</sup>From the University of Groningen, University Medical Center Groningen, The department of Epidemiology, Groningen, The Netherlands.

**Supplementary Figures 1-5**

**Supplementary Tables 1-16**

### Supplementary Figure 1

Sensitivity analyses: Forest plot and Scatter plot of SBP on Cornell product. Instrumental variables independently associated with Cornell product were removed from analyses.

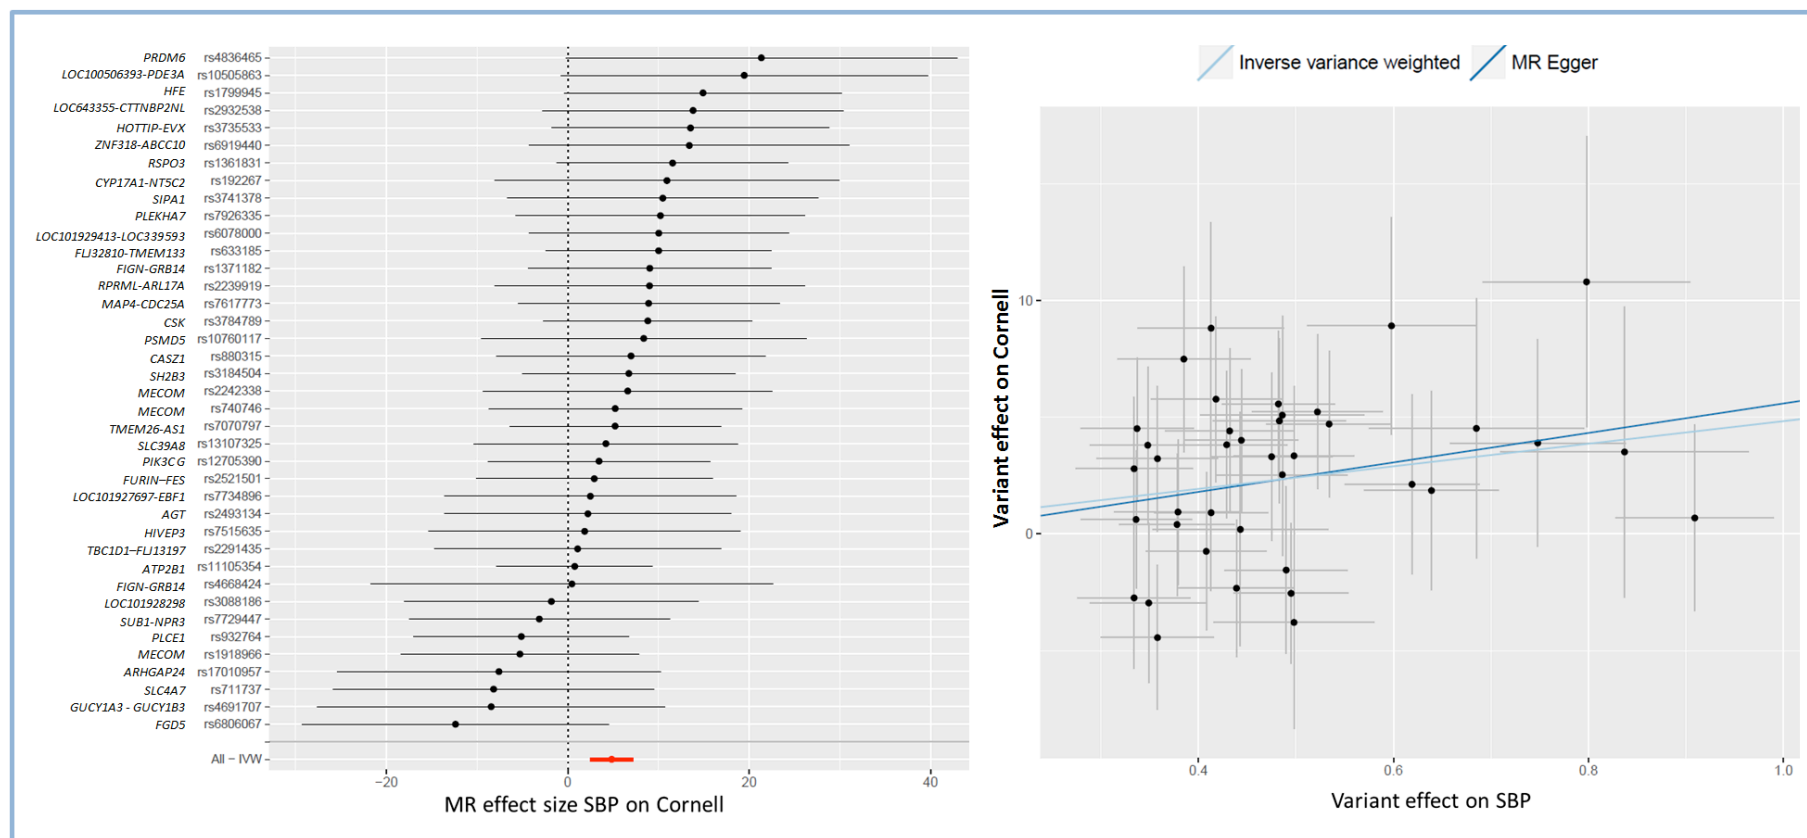

**Left:** In the forest plot the Mendelian Randomization effect size of systolic blood pressure on Cornell product is displayed on the X-axis. On the Y-axis the different genetic variants were listed. **Right:** In the scatterplot the variant effects on systolic blood pressure is displayed on the X-axis and the variant effect on Cornell product on the Y-axis. The light blue line is the regression line of the inverse-variance-weighted fixed-effects meta analyses. The dark blue line is the regression line of the MR Egger regression line. MR = mendelian randomization, SBP = Systolic blood pressure.

## Supplementary Figure 2

Sensitivity analyses: Forest plots of DBP and SBP on Sokolow-Lyon product. Instrumental variables independently associated with Sokolow-Lyon were removed from analyses.

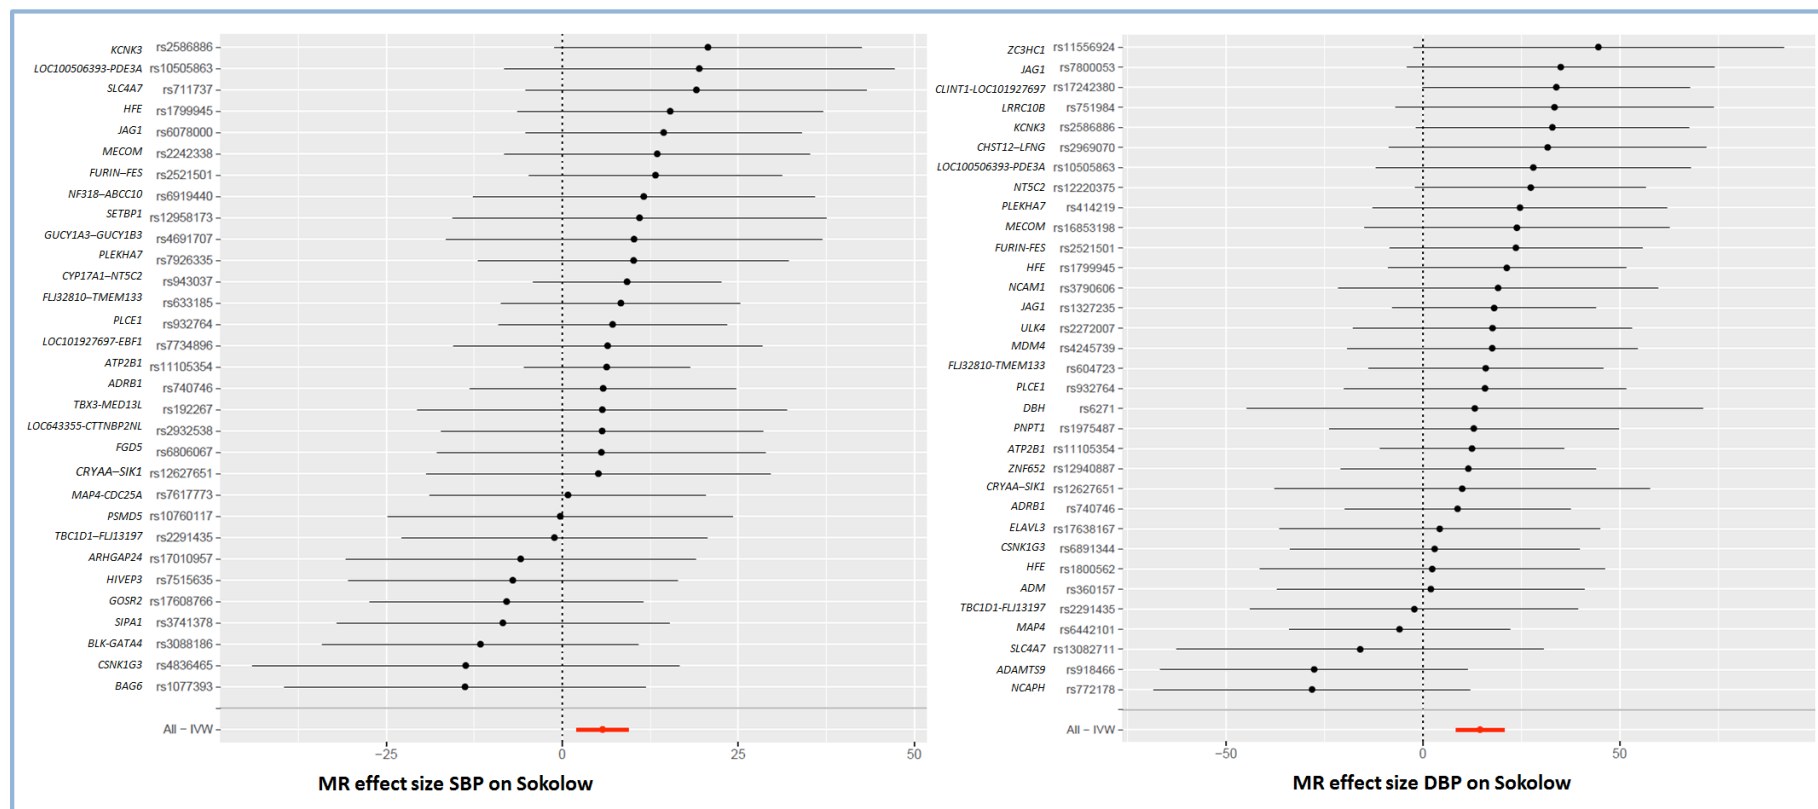

On the X-axis the Mendelian Randomization effect size of blood pressure on Sokolow-Lyon product were displayed. On the Y-axis the different genetic variants were listed. DBP = diastolic blood pressure, MR = mendelian randomization, SBP = systolic blood pressure.

### Supplementary Figure 3

Sensitivity analyses: Scatter plots of DBP and SBP on Sokolow-Lyon product. Instrumental variables independently associated with Sokolow-Lyon were removed from analyses.

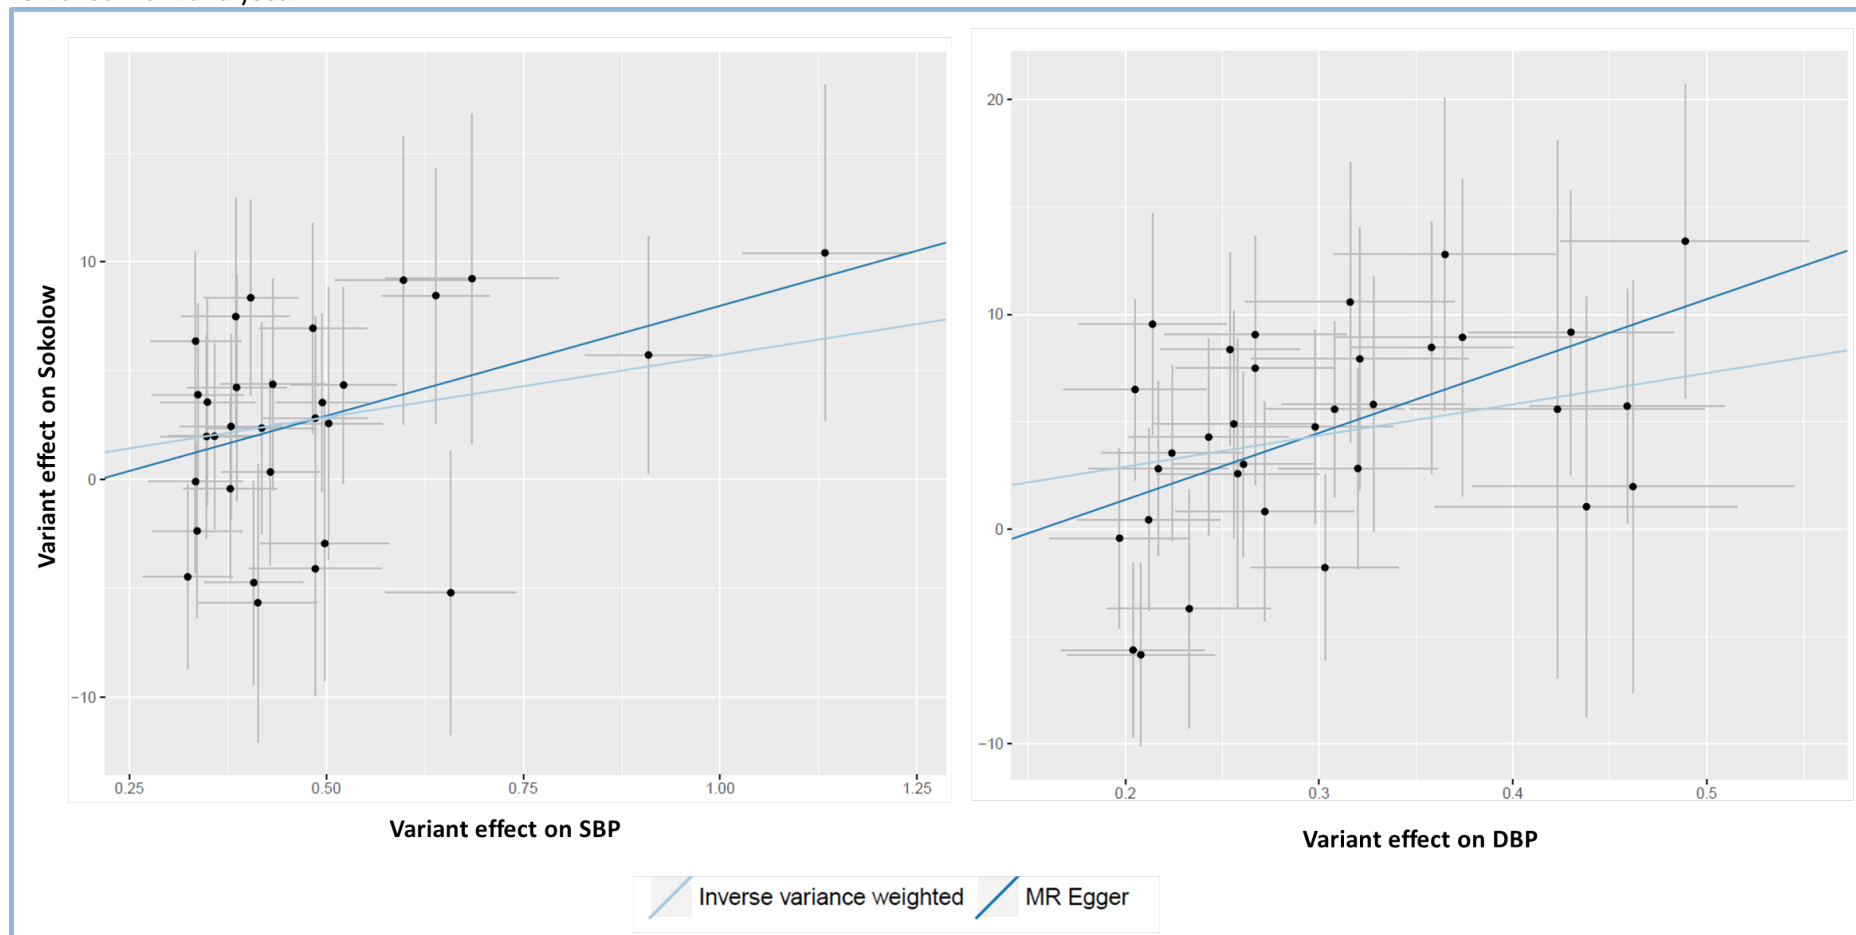

On the X-axis the variant effects on blood pressure are displayed and on the Y-axis the variant effect on Sokolow-Lyon product. The light blue line is the regression line of the inverse-variance-weighted fixed-effects meta analyses. The dark blue line is the regression line of the MR Egger regression line. DBP = diastolic blood pressure, MR = mendelian randomization, SBP = systolic blood pressure

### Supplementary Figure 4

Sensitivity analyses: Forest plots of DBP and SBP on Lead sum product. Instrumental variables independently associated with Lead Sum were removed from analyses.

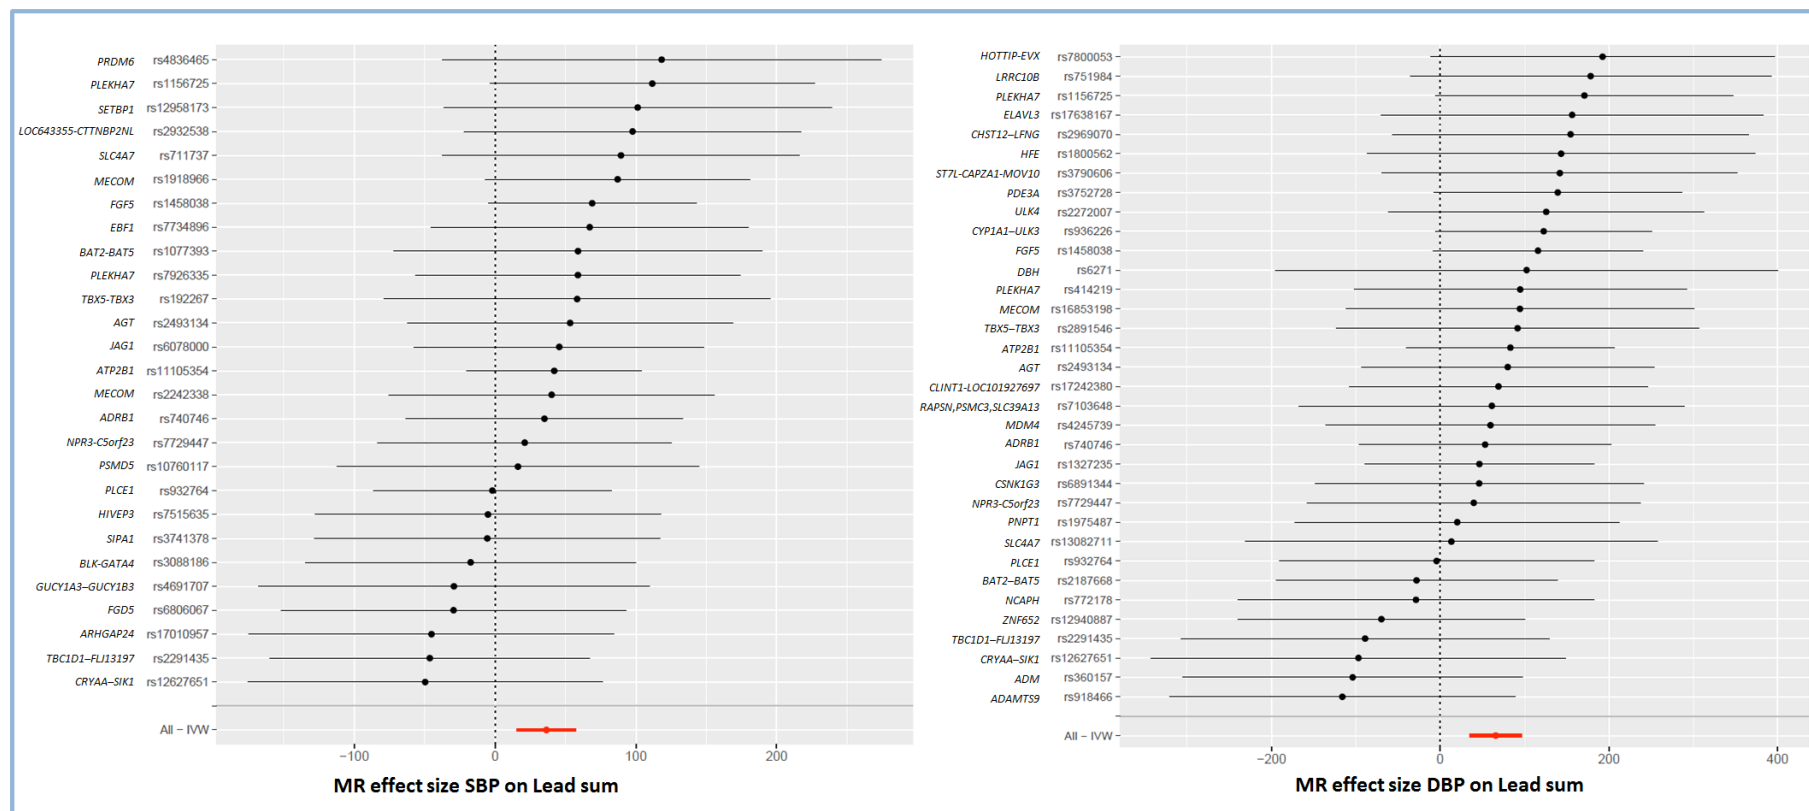

On the X-axis the Mendelian Randomization effect size of blood pressure on Lead sum product were displayed. On the Y-axis the different genetic variants were listed. DBP = diastolic blood pressure, MR = mendelian randomization, SBP = systolic blood pressure

### Supplementary Figure 5

Sensitivity analyses: Scatter plots of DBP and SBP on Lead sum product. Instrumental variables independently associated with Lead Sum were removed from analyses.

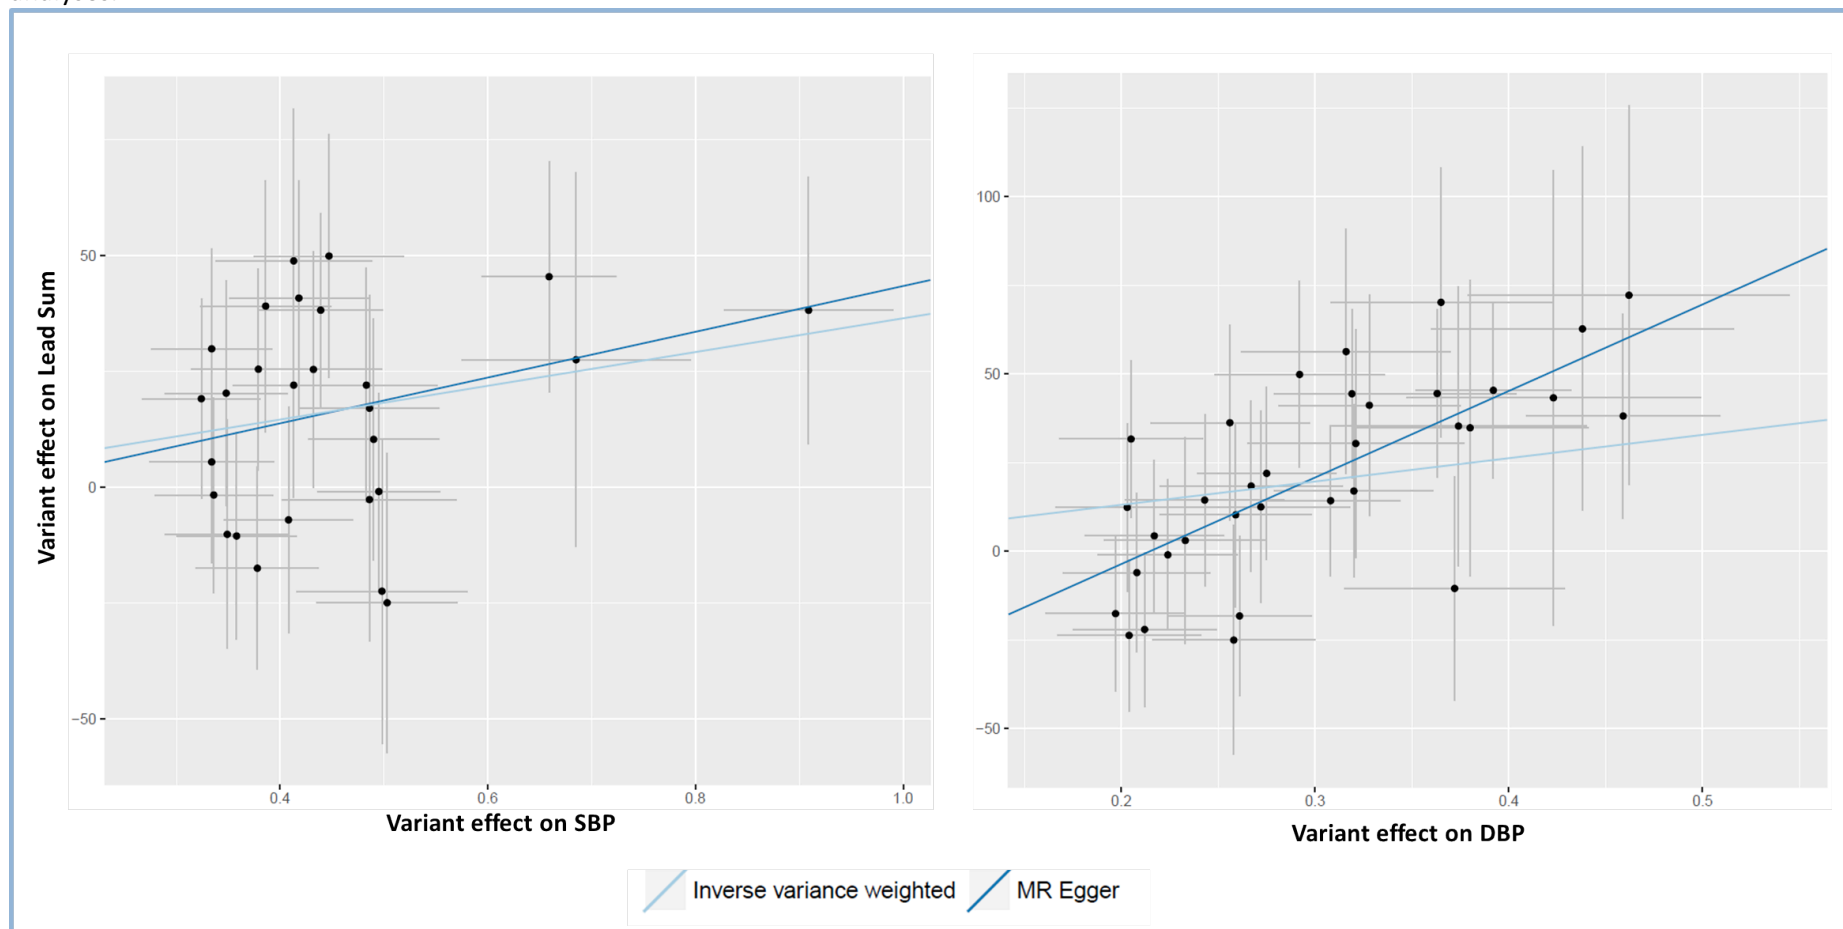

On the X-axis the variant effects on blood pressure are displayed and on the Y-axis the variant effect on Lead sum product. The light blue line is the regression line of the inverse-variance-weighted fixed-effects meta analyses. The dark blue line is the regression line of the MR Egger regression line. DBP = diastolic blood pressure, MR = mendelian randomization, SBP = systolic blood pressure.

**Supplementary Table 1: MR analyses cardiovascular risk factors on QRS traits**

| Risk factor               | QRS trait           | P-value | $\beta$ (SE) | MR Egger intercept | P-value | Heterogeneity P-value |
|---------------------------|---------------------|---------|--------------|--------------------|---------|-----------------------|
| <b>HDL</b>                | <b>QRS duration</b> | 0.945   |              |                    |         |                       |
|                           | Sokolow-Lyon        | 0.558   |              |                    |         |                       |
|                           | Cornell             | 0.638   |              |                    |         |                       |
|                           | 12-lead sum         | 0.187   |              |                    |         |                       |
| <b>LDL</b>                | QRS duration        | 0.249   |              |                    |         |                       |
|                           | Sokolow-Lyon        | 0.453   |              |                    |         |                       |
|                           | Cornell             | 0.407   |              |                    |         |                       |
|                           | 12-lead sum         | 0.395   |              |                    |         |                       |
| <b>Triglyceride</b>       | QRS duration        | 0.407   |              |                    |         |                       |
|                           | Sokolow-Lyon        | 0.635   |              |                    |         |                       |
|                           | Cornell             | 0.162   |              |                    |         |                       |
|                           | 12-lead sum         | 0.96    |              |                    |         |                       |
| <b>Total</b>              | QRS duration        | 0.763   |              |                    |         |                       |
| <b>Cholesterol</b>        | Sokolow-Lyon        | 0.684   |              |                    |         |                       |
|                           | Cornell             | 0.262   |              |                    |         |                       |
|                           | 12-lead sum         | 0.344   |              |                    |         |                       |
| <b>Fasting</b>            | QRS duration        | 0.601   |              |                    |         |                       |
| <b>Glucose</b>            | Sokolow-Lyon        | 0.416   |              |                    |         |                       |
|                           | Cornell             | 0.814   |              |                    |         |                       |
|                           | 12-lead sum         | 0.587   |              |                    |         |                       |
| <b>Fasting</b>            | QRS duration        | 0.371   |              |                    |         |                       |
| <b>Insulin</b>            | Sokolow-Lyon        | 0.489   |              |                    |         |                       |
|                           | Cornell             | 0.465   |              |                    |         |                       |
|                           | 12-lead sum         | 0.747   |              |                    |         |                       |
| <b>BMI</b>                | QRS duration        | 0.619   |              |                    |         |                       |
|                           | Sokolow-Lyon        | 0.372   |              |                    |         |                       |
|                           | Cornell             | 0.514   |              |                    |         |                       |
|                           | 12-lead sum         | 0.29    |              |                    |         |                       |
| <b>Waist Hip</b>          | QRS duration        | 0.658   |              |                    |         |                       |
| <b>Ratio adjusted BMI</b> | Sokolow-Lyon        | 0.179   |              |                    |         |                       |
|                           | Cornell             | 0.113   |              |                    |         |                       |
|                           | 12-lead sum         | 0.326   |              |                    |         |                       |
| <b>Apo A</b>              | QRS duration        | 0.551   |              |                    |         |                       |
|                           | Sokolow-Lyon        | 0.454   |              |                    |         |                       |
|                           | Cornell             | 0.388   |              |                    |         |                       |
|                           | 12-lead sum         | 0.781   |              |                    |         |                       |
| <b>Apo B</b>              | QRS duration        | 0.292   |              |                    |         |                       |
|                           | Sokolow-Lyon        | 0.917   |              |                    |         |                       |
|                           | Cornell             | 0.176   |              |                    |         |                       |
|                           | 12-lead sum         | 0.621   |              |                    |         |                       |
| <b>Cigarettes</b>         | QRS duration        | 0.509   |              |                    |         |                       |
| <b>Per day</b>            | Sokolow-Lyon        | 0.358   |              |                    |         |                       |
|                           | Cornell             | 0.369   |              |                    |         |                       |
|                           | 12-lead sum         | 0.274   |              |                    |         |                       |

Apo A = Apolipoprotein A; Apo B = Apolipoprotein B;  $\beta$  = beta; BMI = Body Mass Index; HDL = High Density Lipoprotein; LDL = Low Density Lipoprotein; SE = Standard Error

**Supplementary Table 2: Sensitivity analyses: MR analyses blood pressure on QRS traits without individually significant IVs on QRS traits**

| Risk factor | QRS trait    | IVs (N) | P-value                       | $\beta$ (SE)  | MR Egger intercept | P-value                       | Heterogeneity P-value |
|-------------|--------------|---------|-------------------------------|---------------|--------------------|-------------------------------|-----------------------|
| <b>SBP</b>  | Sokolow-Lyon | 31      | <b>2.56 x 10<sup>-3</sup></b> | 5.72 (1.90)   | -2.14 (2.90)       | 0.466                         | 0.936                 |
|             | Cornell      | 39      | <b>5.19 x 10<sup>-5</sup></b> | 4.83 (1.19)   | -0.72 (2.23)       | 0.748                         | 0.750                 |
|             | 12-lead sum  | 27      | <b>6.38 x 10<sup>-4</sup></b> | 36.45 (10.67) | -6.00 (18.77)      | 0.752                         | 0.904                 |
| <b>DBP</b>  | Sokolow-Lyon | 33      | <b>3.71 x 10<sup>-6</sup></b> | 14.52 (3.14)  | -4.86 (3.56)       | 0.182                         | 0.883                 |
|             | 12-lead sum  | 34      | <b>3.75 x 10<sup>-5</sup></b> | 65.74 (15.95) | -52.35 (18.94)     | <b>9.38 x 10<sup>-3</sup></b> | 0.890                 |

$\beta$  = beta, DBP = diastolic blood pressure, IV = instrumental variables, MR = Mendelian Randomization, SBP= systolic blood pressure, SE = Standard error



**Supplementary Table 3: Sensitivity analyses by adding more IVs with higher P-values did not show any associations with mortality or longevity.**

| QRS Trait    | P value IVs          | IVs (N) | P-Values            |              |                      |                      |
|--------------|----------------------|---------|---------------------|--------------|----------------------|----------------------|
|              |                      |         | All-cause Mortality | CV Mortality | Fathers age at Death | Mothers age at Death |
| QRS duration | < 1x10 <sup>-8</sup> | 31      | 0.376               | 0.283        | 0.477                | 0.52                 |
|              | < 1x10 <sup>-7</sup> | 40      | 0.728               | 0.422        | 0.669                | 0.553                |
|              | < 1x10 <sup>-6</sup> | 54      | 0.592               | 0.277        | 0.547                | 0.4                  |
|              | < 1x10 <sup>-5</sup> | 83      | 0.929               | 0.496        | 0.597                | 0.396                |
|              | < 1x10 <sup>-4</sup> | 215     | 0.81                | 0.839        | 0.177                | 0.366                |
| Sokolow-Lyon | < 1x10 <sup>-8</sup> | 15      | 0.509               | 0.765        | -                    | 0.842                |
|              | < 1x10 <sup>-7</sup> | 22      | 0.362               | 0.496        | 0.93                 | 0.357                |
|              | < 1x10 <sup>-6</sup> | 31      | 0.388               | 0.647        | 0.482                | 0.391                |
|              | < 1x10 <sup>-5</sup> | 71      | 0.472               | 0.942        | 0.559                | 0.386                |
|              | < 1x10 <sup>-4</sup> | 220     | 0.833               | 0.69         | 0.557                | 0.022                |
| Cornell      | < 1x10 <sup>-8</sup> | 16      | 0.845               | 0.692        | 0.719                | 0.32                 |
|              | < 1x10 <sup>-7</sup> | 21      | 0.544               | 0.406        | 0.526                | 0.695                |
|              | < 1x10 <sup>-6</sup> | 29      | 0.556               | 0.536        | 0.64                 | 0.665                |
|              | < 1x10 <sup>-5</sup> | 64      | 0.9                 | 0.528        | 0.766                | 0.659                |
|              | < 1x10 <sup>-4</sup> | 212     | 0.916               | 0.712        | 0.571                | 0.265                |
| Lead Sum     | < 1x10 <sup>-8</sup> | 26      | 0.396               | 0.119        | 0.756                | 0.94                 |
|              | < 1x10 <sup>-7</sup> | 36      | 0.684               | 0.266        | 0.197                | 0.602                |
|              | < 1x10 <sup>-6</sup> | 48      | 0.495               | 0.16         | 0.17                 | 0.317                |
|              | < 1x10 <sup>-5</sup> | 72      | 0.268               | 0.186        | 0.19                 | 0.254                |
|              | < 1x10 <sup>-4</sup> | 238     | 0.842               | 0.862        | 0.928                | 0.904                |

CV = Cardiovascular, IV = instrumental variables

Supplementay Table 4: Genetic variants associated with systolic blood pressure

| rsID       | EFAL | NEFAL | EAF   | B     | SE    | P-value  |
|------------|------|-------|-------|-------|-------|----------|
| rs11105354 | A    | G     | 0.84  | 0.909 | 0.081 | 3.88E-29 |
| rs17037390 | G    | A     | 0.845 | 0.908 | 0.081 | 5.95E-29 |
| rs943037   | C    | T     | 0.913 | 1.133 | 0.105 | 2.35E-27 |
| rs1458038  | T    | C     | 0.3   | 0.659 | 0.065 | 5.36E-24 |
| rs6026748  | A    | G     | 0.125 | 0.867 | 0.089 | 3.15E-22 |
| rs2521501  | T    | A     | 0.316 | 0.639 | 0.069 | 3.35E-20 |
| rs12705390 | A    | G     | 0.227 | 0.619 | 0.069 | 2.69E-19 |
| rs932764   | G    | A     | 0.446 | 0.495 | 0.059 | 6.88E-17 |
| rs1361831  | C    | T     | 0.459 | 0.482 | 0.058 | 7.38E-17 |
| rs3784789  | C    | G     | 0.352 | 0.534 | 0.064 | 1.01E-16 |
| rs7070797  | G    | A     | 0.87  | 0.748 | 0.09  | 1.14E-16 |
| rs12656497 | C    | T     | 0.597 | 0.487 | 0.06  | 3.85E-16 |
| rs3184504  | T    | C     | 0.475 | 0.498 | 0.062 | 9.97E-16 |
| rs17608766 | C    | T     | 0.146 | 0.658 | 0.083 | 2.27E-15 |
| rs633185   | C    | G     | 0.715 | 0.522 | 0.067 | 6.97E-15 |
| rs7729447  | G    | A     | 0.679 | 0.49  | 0.063 | 7.2E-15  |
| rs1371182  | C    | T     | 0.557 | 0.444 | 0.058 | 1.89E-14 |
| rs592373   | A    | G     | 0.64  | 0.484 | 0.063 | 2.02E-14 |
| rs880315   | C    | T     | 0.359 | 0.475 | 0.062 | 2.09E-14 |
| rs3735533  | C    | T     | 0.92  | 0.798 | 0.106 | 6.48E-14 |
| rs1918966  | A    | G     | 0.461 | 0.439 | 0.06  | 1.89E-13 |
| rs12627651 | A    | G     | 0.292 | 0.503 | 0.068 | 1.97E-13 |
| rs740746   | A    | G     | 0.73  | 0.486 | 0.067 | 4.59E-13 |
| rs6078000  | G    | A     | 0.273 | 0.483 | 0.068 | 9.39E-13 |
| rs2493134  | C    | T     | 0.421 | 0.413 | 0.058 | 9.65E-13 |
| rs1620668  | G    | A     | 0.178 | 0.535 | 0.076 | 1.45E-12 |
| rs1799945  | G    | C     | 0.143 | 0.598 | 0.086 | 3.28E-12 |
| rs1450271  | T    | C     | 0.468 | 0.413 | 0.059 | 3.4E-12  |
| rs7617773  | T    | C     | 0.684 | 0.429 | 0.062 | 5.31E-12 |
| rs2586886  | C    | T     | 0.401 | 0.404 | 0.059 | 5.94E-12 |
| rs11014171 | C    | T     | 0.66  | 0.419 | 0.061 | 6.5E-12  |
| rs13107325 | C    | T     | 0.93  | 0.837 | 0.127 | 4.69E-11 |
| rs3088186  | T    | C     | 0.309 | 0.408 | 0.062 | 4.94E-11 |
| rs7926335  | T    | C     | 0.264 | 0.432 | 0.066 | 7.67E-11 |
| rs2291435  | C    | T     | 0.487 | 0.378 | 0.059 | 1.03E-10 |
| rs2932538  | G    | A     | 0.747 | 0.418 | 0.067 | 3.79E-10 |
| rs2242338  | A    | C     | 0.923 | 0.685 | 0.11  | 5.55E-10 |
| rs1156725  | C    | T     | 0.196 | 0.447 | 0.072 | 5.65E-10 |
| rs6806067  | A    | C     | 0.444 | 0.358 | 0.058 | 7.19E-10 |
| rs12958173 | A    | C     | 0.313 | 0.386 | 0.063 | 1.19E-09 |
| rs17010957 | C    | T     | 0.143 | 0.498 | 0.082 | 1.51E-09 |
| rs192267   | G    | T     | 0.474 | 0.348 | 0.059 | 3.2E-09  |
| rs7515635  | T    | C     | 0.474 | 0.336 | 0.057 | 4.54E-09 |
| rs6919440  | G    | A     | 0.43  | 0.337 | 0.058 | 4.92E-09 |
| rs7734896  | G    | T     | 0.559 | 0.379 | 0.065 | 6.5E-09  |
| rs4691707  | G    | A     | 0.348 | 0.349 | 0.06  | 7.1E-09  |
| rs2239919  | A    | G     | 0.351 | 0.358 | 0.062 | 7.39E-09 |
| rs3741378  | C    | T     | 0.863 | 0.486 | 0.084 | 8.04E-09 |
| rs12247028 | G    | A     | 0.389 | 0.364 | 0.063 | 8.16E-09 |
| rs711737   | A    | C     | 0.604 | 0.334 | 0.058 | 9.93E-09 |
| rs10505863 | C    | T     | 0.742 | 0.385 | 0.068 | 1.24E-08 |
| rs1077393  | G    | A     | 0.471 | 0.324 | 0.057 | 1.64E-08 |
| rs2594992  | C    | A     | 0.393 | 0.334 | 0.06  | 2.31E-08 |
| rs10760117 | T    | G     | 0.414 | 0.334 | 0.06  | 2.54E-08 |

Tabl. 4 Systolic Blood Pressure

|           |   |   |       |       |       |          |
|-----------|---|---|-------|-------|-------|----------|
| rs4836465 | G | A | 0.184 | 0.413 | 0.075 | 3.83E-08 |
|-----------|---|---|-------|-------|-------|----------|

Supplementary Table 5: Genetic variants associated with diastolic blood pressure

| rsID       | EFAL | NEFAL | EAF   | B     | SE    | P-value    |
|------------|------|-------|-------|-------|-------|------------|
| rs6026748  | A    | G     | 0.126 | 0.552 | 0.055 | 4.86E-24   |
| rs17037390 | G    | A     | 0.845 | 0.499 | 0.05  | 1.2E-23    |
| rs1458038  | T    | C     | 0.302 | 0.392 | 0.04  | 7.36E-23   |
| rs3184504  | T    | C     | 0.473 | 0.362 | 0.038 | 1.28E-21   |
| rs11105354 | A    | G     | 0.841 | 0.459 | 0.05  | 2.61E-20   |
| rs12243859 | C    | T     | 0.676 | 0.335 | 0.038 | 8.11E-19   |
| rs936226   | C    | T     | 0.278 | 0.363 | 0.041 | 1.03E-18   |
| rs7076398  | T    | A     | 0.812 | 0.409 | 0.047 | 2.55E-18   |
| rs1327235  | G    | A     | 0.458 | 0.308 | 0.036 | 1.78E-17   |
| rs2521501  | T    | A     | 0.316 | 0.358 | 0.042 | 1.85E-17   |
| rs1799945  | G    | C     | 0.142 | 0.43  | 0.053 | 3.1E-16    |
| rs6442101  | T    | C     | 0.693 | 0.303 | 0.038 | 1.6E-15    |
| rs3752728  | A    | G     | 0.738 | 0.319 | 0.04  | 2.35E-15   |
| rs740746   | A    | G     | 0.73  | 0.32  | 0.041 | 8.63E-15   |
| rs2493134  | C    | T     | 0.421 | 0.275 | 0.036 | 9.53E-15   |
| rs13190766 | G    | A     | 0.458 | 0.271 | 0.035 | 1.42E-14   |
| rs13107325 | C    | T     | 0.93  | 0.602 | 0.078 | 1.63E-14   |
| rs12220375 | T    | C     | 0.912 | 0.489 | 0.064 | 2.23E-14   |
| rs604723   | C    | T     | 0.724 | 0.298 | 0.04  | 1.02E-13   |
| rs592373   | A    | G     | 0.64  | 0.282 | 0.039 | 3.61E-13   |
| rs12940887 | T    | C     | 0.381 | 0.261 | 0.037 | 1.07E-12   |
| rs9287843  | C    | T     | 0.554 | 0.254 | 0.036 | 1.13E-12   |
| rs2586886  | C    | T     | 0.402 | 0.254 | 0.036 | 1.92E-12   |
| rs2272007  | T    | C     | 0.18  | 0.328 | 0.047 | 3.94E-12   |
| rs929250   | T    | G     | 0.919 | 0.452 | 0.066 | 6.4E-12    |
| rs880315   | C    | T     | 0.36  | 0.257 | 0.038 | 1.34E-11   |
| rs7729447  | G    | A     | 0.679 | 0.259 | 0.039 | 1.88E-11   |
| rs1156725  | C    | T     | 0.196 | 0.292 | 0.044 | 3.67E-11   |
| rs4247374  | C    | T     | 0.857 | 0.369 | 0.056 | 3.89E-11   |
| rs2187668  | C    | T     | 0.874 | 0.372 | 0.057 | 4.31E-11   |
| rs223102   | C    | T     | 0.468 | 0.235 | 0.036 | 6.4E-11    |
| rs10505863 | C    | T     | 0.742 | 0.267 | 0.041 | 1.07E-10   |
| rs7800053  | G    | A     | 0.112 | 0.365 | 0.057 | 1.82E-10   |
| rs2891546  | G    | A     | 0.89  | 0.38  | 0.061 | 4.71E-10   |
| rs3790606  | C    | G     | 0.35  | 0.256 | 0.041 | 5.15E-10   |
| rs12627651 | A    | G     | 0.292 | 0.258 | 0.042 | 6.24E-10   |
| rs932764   | G    | A     | 0.448 | 0.224 | 0.036 | 6.28E-10   |
| rs1975487  | G    | A     | 0.544 | 0.217 | 0.036 | 1.27E-09   |
| rs17080093 | C    | T     | 0.925 | 0.411 | 0.068 | 1.71E-09   |
| rs6891344  | A    | G     | 0.818 | 0.272 | 0.046 | 3.06E-09   |
| rs4245739  | A    | C     | 0.739 | 0.243 | 0.041 | 4.63E-09   |
| rs751984   | T    | C     | 0.872 | 0.316 | 0.054 | 4.92E-09   |
| rs360157   | T    | C     | 0.598 | 0.212 | 0.037 | 7.18E-09   |
| rs414219   | G    | C     | 0.134 | 0.321 | 0.056 | 7.58E-09   |
| rs17242380 | C    | T     | 0.254 | 0.267 | 0.047 | 9.28E-09   |
| rs16853198 | A    | G     | 0.92  | 0.374 | 0.066 | 1.31E-08   |
| rs11556924 | C    | T     | 0.622 | 0.214 | 0.038 | 1.76E-08   |
| rs17638167 | C    | T     | 0.95  | 0.462 | 0.083 | 0.00000022 |
| rs1800562  | A    | G     | 0.061 | 0.438 | 0.078 | 2.39E-08   |
| rs6271     | C    | T     | 0.93  | 0.423 | 0.076 | 2.61E-08   |
| rs918466   | G    | A     | 0.597 | 0.204 | 0.037 | 0.00000027 |
| rs2969070  | G    | A     | 0.354 | 0.205 | 0.037 | 3.21E-08   |
| rs772178   | G    | A     | 0.363 | 0.208 | 0.038 | 3.58E-08   |
| rs13082711 | C    | T     | 0.227 | 0.233 | 0.042 | 4.05E-08   |

Tabl. 5Diastolic Blood Pressure

|           |   |   |       |       |       |          |
|-----------|---|---|-------|-------|-------|----------|
| rs7103648 | G | A | 0.383 | 0.203 | 0.037 | 4.39E-08 |
| rs2291435 | C | T | 0.488 | 0.197 | 0.036 | 4.43E-08 |
| rs4612801 | C | T | 0.494 | 0.197 | 0.036 | 4.53E-08 |

Supplementary Table 6: Genetic variants associated with high density lipoprotein

| rsID       | EFAL | NEFAL | EAF     | B      | SE     | P-value   |
|------------|------|-------|---------|--------|--------|-----------|
| rs9989419  | G    | A     | 0.595   | 0.1473 | 0.0036 | 1E-200    |
| rs10468017 | T    | C     | 0.2757  | 0.1179 | 0.0038 | 1.21E-188 |
| rs13702    | C    | T     | 0.3127  | 0.1058 | 0.0038 | 1.28E-160 |
| rs4939883  | C    | T     | 0.8193  | 0.0799 | 0.0045 | 1.796E-66 |
| rs1883025  | C    | T     | 0.7573  | 0.0698 | 0.0041 | 1.496E-65 |
| rs2241770  | T    | C     | 0.8971  | 0.0989 | 0.0057 | 6.784E-60 |
| rs633695   | G    | A     | 0.285   | 0.0885 | 0.0054 | 7.82E-58  |
| rs676210   | A    | G     | 0.2309  | 0.066  | 0.004  | 2.345E-54 |
| rs16942887 | A    | G     | 0.1332  | 0.0831 | 0.0051 | 8.281E-54 |
| rs964184   | C    | G     | NA      | 0.1065 | 0.0071 | 6.086E-48 |
| rs4240624  | A    | G     | 0.9248  | 0.0818 | 0.0058 | 1.323E-45 |
| rs4846914  | A    | G     | 0.5844  | 0.0479 | 0.0034 | 3.513E-41 |
| rs4465830  | A    | G     | 0.7982  | 0.0597 | 0.0044 | 5.175E-40 |
| rs3847502  | A    | C     | 0.314   | 0.048  | 0.0036 | 3.306E-38 |
| rs838876   | A    | G     | 0.3259  | 0.0493 | 0.0039 | 7.325E-33 |
| rs103294   | T    | C     | 0.186   | 0.0523 | 0.0044 | 3.995E-30 |
| rs10808546 | T    | C     | 0.4459  | 0.0409 | 0.0034 | 4.106E-30 |
| rs102275   | T    | C     | 0.628   | 0.0391 | 0.0035 | 6.404E-28 |
| rs686030   | A    | C     | 0.8588  | 0.055  | 0.0049 | 4.292E-27 |
| rs2075650  | A    | G     | 0.8734  | 0.0554 | 0.0051 | 9.716E-26 |
| rs1689797  | C    | A     | 0.6979  | 0.0358 | 0.0036 | 2.852E-21 |
| rs11789603 | T    | C     | 0.08971 | 0.06   | 0.006  | 3.695E-21 |
| rs2241210  | G    | A     | 0.5528  | 0.0332 | 0.0035 | 2.489E-20 |
| rs1877031  | A    | G     | 0.6755  | 0.0336 | 0.0036 | 1.204E-19 |
| rs2925979  | C    | T     | 0.7045  | 0.0351 | 0.0037 | 1.321E-19 |
| rs7306660  | G    | A     | 0.6306  | 0.0345 | 0.0036 | 3.341E-19 |
| rs4660293  | A    | G     | 0.7639  | 0.0353 | 0.004  | 2.863E-18 |
| rs2278236  | A    | G     | 0.5435  | 0.0331 | 0.0035 | 3.185E-18 |
| rs1515110  | G    | T     | 0.3813  | 0.0323 | 0.0035 | 8.038E-18 |
| rs181360   | T    | G     | 0.8008  | 0.0376 | 0.0042 | 9.238E-18 |
| rs2250802  | G    | A     | 0.3193  | 0.034  | 0.0038 | 2.022E-17 |
| rs11765979 | C    | A     | 0.4578  | 0.0412 | 0.0048 | 3.111E-17 |
| rs2293889  | G    | T     | 0.5871  | 0.0312 | 0.0035 | 4.271E-17 |
| rs737337   | T    | C     | 0.9314  | 0.0565 | 0.0061 | 4.564E-17 |
| rs12748152 | C    | T     | 0.92876 | 0.0506 | 0.0062 | 9.737E-16 |
| rs13107325 | C    | T     | 0.92216 | 0.0708 | 0.0078 | 1.065E-15 |
| rs12740374 | T    | G     | 0.2124  | 0.0343 | 0.0041 | 1.687E-15 |
| rs7607980  | C    | T     | 0.1491  | 0.0447 | 0.0052 | 1.807E-15 |
| rs2288912  | G    | C     | 0.4987  | 0.0297 | 0.0036 | 7.148E-15 |
| rs2454722  | G    | A     | 0.1451  | 0.0351 | 0.0044 | 3.308E-14 |
| rs4148005  | T    | G     | 0.7005  | 0.0283 | 0.0036 | 5.743E-14 |
| rs3741414  | T    | C     | 0.1913  | 0.0296 | 0.004  | 6.095E-14 |
| rs2642438  | G    | A     | 0.7454  | 0.0303 | 0.0039 | 7.781E-14 |
| rs205262   | A    | G     | 0.7335  | 0.0283 | 0.0039 | 3.878E-13 |
| rs17145738 | T    | C     | 0.1174  | 0.0408 | 0.0053 | 4.952E-13 |
| rs687339   | C    | T     | 0.2335  | 0.0316 | 0.0042 | 7.108E-13 |
| rs9457931  | A    | G     | 0.9314  | 0.0552 | 0.0073 | 7.297E-13 |
| rs492571   | T    | C     | 0.95778 | 0.0663 | 0.009  | 1.265E-12 |
| rs4969178  | G    | A     | 0.6266  | 0.0263 | 0.0035 | 1.532E-12 |
| rs3822072  | G    | A     | 0.5119  | 0.0251 | 0.0034 | 4.058E-12 |
| rs702485   | G    | A     | 0.4499  | 0.0243 | 0.0034 | 6.45E-12  |
| rs2013208  | T    | C     | 0.5053  | 0.0254 | 0.0036 | 8.916E-12 |
| rs4142995  | G    | T     | 0.6161  | 0.0263 | 0.0037 | 9.365E-12 |
| rs4379922  | C    | T     | 0.3496  | 0.0247 | 0.0036 | 9.559E-12 |

Tabl. 6 HDL

|            |   |   |         |        |        |           |
|------------|---|---|---------|--------|--------|-----------|
| rs998584   | C | A | 0.4855  | 0.026  | 0.0038 | 2.269E-11 |
| rs12133576 | A | G | 0.3549  | 0.0243 | 0.0035 | 6.15E-11  |
| rs3861397  | A | G | 0.6583  | 0.024  | 0.0036 | 8.401E-11 |
| rs970548   | C | A | 0.277   | 0.0258 | 0.0039 | 1.706E-10 |
| rs7112577  | G | C | NA      | 0.0826 | 0.0129 | 2.34E-10  |
| rs1936800  | C | T | 0.5277  | 0.02   | 0.0034 | 3.055E-10 |
| rs1980493  | T | C | 0.8773  | 0.0318 | 0.0048 | 3.764E-10 |
| rs6450176  | G | A | 0.7216  | 0.0254 | 0.0039 | 6.875E-10 |
| rs2066714  | C | T | 0.1201  | 0.0453 | 0.0071 | 7.258E-10 |
| rs1866956  | T | C | 0.6755  | 0.0217 | 0.0037 | 7.964E-10 |
| rs1047891  | C | A | 0.6979  | 0.0269 | 0.0039 | 8.73E-10  |
| rs11065987 | A | G | 0.5778  | 0.0222 | 0.0035 | 1.225E-09 |
| rs12412743 | C | T | 0.847   | 0.0291 | 0.0045 | 1.307E-09 |
| rs6031587  | C | T | 0.9314  | 0.0488 | 0.0074 | 1.919E-09 |
| rs10087900 | G | A | 0.5607  | 0.0231 | 0.0036 | 2.174E-09 |
| rs6567160  | T | C | 0.7691  | 0.0257 | 0.0041 | 2.918E-09 |
| rs11045163 | G | A | 0.4063  | 0.0217 | 0.0035 | 3.196E-09 |
| rs731839   | A | G | 0.6583  | 0.022  | 0.0037 | 3.441E-09 |
| rs2290547  | G | A | 0.7889  | 0.0297 | 0.0046 | 3.69E-09  |
| rs10761771 | C | T | 0.467   | 0.0198 | 0.0034 | 4.12E-09  |
| rs13076253 | A | C | 0.8522  | 0.0283 | 0.0048 | 4.961E-09 |
| rs4650994  | G | A | 0.5172  | 0.021  | 0.0034 | 6.696E-09 |
| rs16965220 | A | C | 0.2982  | 0.0219 | 0.0037 | 7.909E-09 |
| rs4983559  | G | A | 0.3773  | 0.0197 | 0.0036 | 9.565E-09 |
| rs4917014  | G | T | 0.3404  | 0.0222 | 0.0036 | 1.026E-08 |
| rs499974   | C | A | 0.8245  | 0.0263 | 0.0044 | 1.12E-08  |
| rs6805251  | T | C | 0.3813  | 0.02   | 0.0035 | 1.332E-08 |
| rs12145743 | G | T | 0.3311  | 0.0203 | 0.0036 | 1.803E-08 |
| rs13099479 | A | G | 0.08971 | 0.036  | 0.0062 | 1.819E-08 |
| rs17173637 | T | C | 0.90237 | 0.0363 | 0.0057 | 1.899E-08 |
| rs12801636 | A | G | 0.2243  | 0.0235 | 0.0042 | 3.147E-08 |
| rs2606736  | C | T | 0.3945  | 0.0246 | 0.0043 | 4.799E-08 |
| rs424346   | T | C | 0.04881 | 0.0679 | 0.0113 | 4.84E-08  |
| rs10019888 | A | G | 0.8364  | 0.027  | 0.0046 | 4.901E-08 |
| rs2602836  | A | G | 0.4274  | 0.0192 | 0.0034 | 4.964E-08 |

Tabl. 7 LDL

| rsID       | EFAL | NEFAL | EAF     | B      | SE     | P-value   |
|------------|------|-------|---------|--------|--------|-----------|
| rs7254892  | G    | A     | 0.96834 | 0.4853 | 0.0119 | 1E-200    |
| rs646776   | T    | C     | 0.7876  | 0.1602 | 0.0044 | 1E-200    |
| rs6511720  | G    | T     | 0.90237 | 0.2209 | 0.0061 | 1E-200    |
| rs1367117  | A    | G     | 0.2876  | 0.1186 | 0.004  | 9.48E-183 |
| rs11591147 | G    | T     | 0.98285 | 0.497  | 0.018  | 8.58E-143 |
| rs12721109 | G    | A     | 0.98285 | 0.4462 | 0.0183 | 2.99E-122 |
| rs6544713  | T    | C     | 0.2942  | 0.0806 | 0.0041 | 4.843E-83 |
| rs12916    | C    | T     | 0.4314  | 0.0733 | 0.0038 | 7.792E-78 |
| rs2965157  | T    | C     | 0.97889 | 0.1886 | 0.0112 | 7.292E-62 |
| rs2954029  | A    | T     | 0.5317  | 0.0564 | 0.0036 | 2.095E-50 |
| rs579459   | C    | T     | 0.215   | 0.0665 | 0.0045 | 2.419E-44 |
| rs2228603  | C    | T     | 0.92876 | 0.104  | 0.0072 | 4.433E-44 |
| rs2000999  | A    | G     | 0.1847  | 0.065  | 0.0046 | 4.219E-41 |
| rs174583   | C    | T     | 0.6253  | 0.0522 | 0.0038 | 7.003E-41 |
| rs247616   | C    | T     | 0.7071  | 0.0547 | 0.0041 | 2.566E-37 |
| rs7551981  | T    | G     | 0.595   | 0.0472 | 0.0038 | 1.362E-33 |
| rs6882076  | C    | T     | 0.6662  | 0.0456 | 0.0038 | 3.31E-31  |
| rs6065311  | C    | T     | 0.4604  | 0.0417 | 0.0036 | 1.656E-30 |
| rs964184   | G    | C     | NA      | 0.0855 | 0.0078 | 2.008E-26 |
| rs2587534  | A    | G     | 0.5277  | 0.0391 | 0.0037 | 8.055E-25 |
| rs75687619 | T    | G     | 0.02375 | 0.1735 | 0.0161 | 8.052E-24 |
| rs9987289  | G    | A     | 0.9248  | 0.0714 | 0.0066 | 8.529E-24 |
| rs2073547  | G    | A     | 0.1939  | 0.0485 | 0.0049 | 1.923E-21 |
| rs1564348  | C    | T     | 0.1451  | 0.0481 | 0.005  | 2.762E-21 |
| rs10893499 | A    | G     | 0.1438  | 0.0521 | 0.0053 | 3.861E-21 |
| rs1169288  | C    | A     | 0.3338  | 0.0375 | 0.004  | 6.447E-21 |
| rs2738459  | A    | C     | 0.5554  | 0.0532 | 0.0058 | 2.261E-19 |
| rs6016373  | A    | G     | 0.6266  | 0.0349 | 0.0037 | 7.947E-19 |
| rs10947332 | A    | G     | 0.1319  | 0.0504 | 0.0056 | 6.969E-18 |
| rs3757354  | C    | T     | 0.7902  | 0.0382 | 0.0044 | 2.087E-17 |
| rs7832643  | T    | G     | 0.405   | 0.0339 | 0.0038 | 2.671E-17 |
| rs10903129 | G    | A     | 0.5369  | 0.0328 | 0.0037 | 3.03E-17  |
| rs13277801 | C    | T     | 0.347   | 0.0338 | 0.0038 | 3.994E-17 |
| rs2642438  | G    | A     | 0.7454  | 0.0352 | 0.0042 | 7.318E-16 |
| rs8017377  | A    | G     | 0.4591  | 0.0303 | 0.0038 | 2.516E-15 |
| rs4722551  | C    | T     | 0.1702  | 0.0391 | 0.0049 | 3.949E-14 |
| rs10832962 | T    | C     | 0.719   | 0.032  | 0.004  | 6.619E-14 |
| rs2737252  | G    | A     | 0.7441  | 0.0314 | 0.0041 | 7.039E-14 |
| rs2419604  | A    | G     | 0.3179  | 0.0302 | 0.004  | 7.49E-14  |
| rs4970712  | C    | A     | 0.8061  | 0.0339 | 0.0044 | 2.458E-13 |
| rs6504872  | T    | C     | 0.4723  | 0.0274 | 0.0037 | 3.479E-13 |
| rs10490626 | G    | A     | 0.92084 | 0.0508 | 0.0069 | 1.697E-12 |
| rs12748152 | T    | C     | 0.07124 | 0.0499 | 0.0066 | 3.209E-12 |
| rs4530754  | A    | G     | 0.5818  | 0.0275 | 0.0036 | 3.576E-12 |
| rs3184504  | C    | T     | 0.5343  | 0.0268 | 0.0038 | 4.203E-12 |
| rs2315065  | A    | C     | 0.08707 | 0.1102 | 0.0158 | 5.23E-12  |
| rs16831243 | T    | C     | 0.1807  | 0.0378 | 0.0055 | 9.063E-12 |
| rs72902576 | T    | G     | 0.96306 | 0.0933 | 0.0133 | 9.576E-12 |
| rs1801689  | C    | A     | 0.03694 | 0.1028 | 0.0139 | 9.809E-12 |
| rs7534572  | G    | C     | 0.69    | 0.0407 | 0.0058 | 1.288E-11 |
| rs676388   | C    | T     | 0.4631  | 0.0265 | 0.0039 | 1.31E-11  |
| rs9875338  | G    | A     | 0.6121  | 0.027  | 0.0037 | 2.21E-11  |
| rs4942486  | T    | C     | 0.4617  | 0.0243 | 0.0037 | 2.261E-11 |
| rs2886232  | T    | C     | 0.1201  | 0.0451 | 0.0064 | 3.876E-11 |



Tabl. 7 LDL

|             |   |   |         |        |        |           |
|-------------|---|---|---------|--------|--------|-----------|
| rs1883025   | C | T | 0.7573  | 0.0296 | 0.0044 | 6.141E-11 |
| rs6909746   | C | T | 0.6082  | 0.0263 | 0.0037 | 7.86E-11  |
| rs314253    | T | C | 0.6649  | 0.0242 | 0.0038 | 3.436E-10 |
| rs364585    | G | A | 0.6332  | 0.0249 | 0.0038 | 4.278E-10 |
| rs6709904   | A | G | 0.8865  | 0.055  | 0.0085 | 4.577E-10 |
| rs1800961   | C | T | 0.9657  | 0.0685 | 0.0106 | 6.034E-10 |
| rs112201728 | T | C | 0.05805 | 0.0675 | 0.0104 | 8.514E-10 |
| rs3780181   | A | G | 0.94723 | 0.0445 | 0.0074 | 1.764E-09 |
| rs17404153  | G | T | 0.8562  | 0.0336 | 0.0054 | 1.832E-09 |
| rs1408272   | T | G | 0.94723 | 0.052  | 0.0083 | 3.675E-09 |
| rs267733    | A | G | 0.8628  | 0.0331 | 0.0053 | 5.285E-09 |
| rs2328223   | C | A | 0.2493  | 0.0299 | 0.005  | 5.632E-09 |
| rs2710642   | A | G | 0.6187  | 0.0239 | 0.0038 | 6.089E-09 |
| rs16891156  | C | A | 0.01847 | 0.0965 | 0.0171 | 8.233E-09 |
| rs2030746   | T | C | 0.3984  | 0.0214 | 0.0038 | 8.605E-09 |
| rs7640978   | C | T | 0.8945  | 0.0392 | 0.0069 | 9.837E-09 |
| rs12066643  | C | T | 0.8813  | 0.0389 | 0.0064 | 1.063E-08 |
| rs5763662   | T | C | 0.02507 | 0.0767 | 0.0121 | 1.191E-08 |
| rs6818397   | T | G | 0.4129  | 0.0224 | 0.004  | 1.677E-08 |
| rs2390536   | A | G | 0.3681  | 0.0223 | 0.0038 | 2.037E-08 |
| rs1250229   | C | T | 0.7889  | 0.0243 | 0.0042 | 3.13E-08  |
| rs4253776   | G | A | 0.124   | 0.0311 | 0.0059 | 3.353E-08 |
| rs2495495   | T | C | 0.1346  | 0.0342 | 0.0059 | 3.52E-08  |
| rs10195252  | T | C | 0.5818  | 0.0238 | 0.0039 | 3.812E-08 |
| rs11563251  | T | C | 0.1253  | 0.0345 | 0.0062 | 4.499E-08 |
| rs13206249  | G | A | 0.7836  | 0.0378 | 0.0062 | 4.534E-08 |

Tabl. 8 Triglycerides

| rsID       | EFAL | NEFAL | EAF     | B      | SE     | P-value   |
|------------|------|-------|---------|--------|--------|-----------|
| rs10790162 | A    | G     | 0.09103 | 0.2305 | 0.0065 | 1E-200    |
| rs1260326  | T    | C     | 0.4129  | 0.1148 | 0.0034 | 1E-200    |
| rs12678919 | A    | G     | 0.8786  | 0.1702 | 0.0056 | 1.82E-199 |
| rs2954022  | C    | A     | 0.5303  | 0.078  | 0.0033 | 2.23E-113 |
| rs11974409 | A    | G     | 0.8061  | 0.0899 | 0.0042 | 1.36E-100 |
| rs4587594  | G    | A     | 0.69    | 0.0694 | 0.0035 | 3.503E-82 |
| rs676210   | G    | A     | 0.7691  | 0.0733 | 0.0039 | 3.284E-71 |
| rs10401969 | T    | C     | 0.92876 | 0.121  | 0.0065 | 9.702E-70 |
| rs439401   | C    | T     | 0.6201  | 0.0659 | 0.0038 | 1.423E-66 |
| rs174535   | C    | T     | 0.3628  | 0.047  | 0.0034 | 1.733E-41 |
| rs11820504 | C    | T     | 0.2032  | 0.0604 | 0.0044 | 1.095E-39 |
| rs4810479  | C    | T     | 0.2876  | 0.0474 | 0.0038 | 2.067E-34 |
| rs1321257  | G    | A     | 0.4063  | 0.0402 | 0.0034 | 5.986E-31 |
| rs588136   | C    | T     | 0.2058  | 0.0495 | 0.0041 | 3.365E-30 |
| rs247616   | C    | T     | 0.7071  | 0.0393 | 0.0037 | 1.123E-25 |
| rs2247056  | C    | T     | 0.7823  | 0.0378 | 0.0039 | 3.861E-21 |
| rs2043085  | T    | C     | 0.3681  | 0.0327 | 0.0034 | 7.809E-20 |
| rs442177   | T    | G     | 0.5528  | 0.0309 | 0.0033 | 1.316E-18 |
| rs10761762 | T    | C     | 0.533   | 0.027  | 0.0033 | 1.061E-17 |
| rs16948098 | A    | G     | 0.0409  | 0.08   | 0.0089 | 4.838E-17 |
| rs9686661  | T    | C     | 0.1768  | 0.0379 | 0.0044 | 2.541E-16 |
| rs6882076  | C    | T     | 0.6662  | 0.0286 | 0.0035 | 1.513E-15 |
| rs13389219 | C    | T     | 0.591   | 0.0271 | 0.0034 | 2.598E-15 |
| rs2972146  | T    | G     | 0.6227  | 0.0281 | 0.0034 | 2.974E-15 |
| rs998584   | A    | C     | 0.5145  | 0.0293 | 0.0037 | 3.424E-15 |
| rs634869   | T    | C     | 0.438   | 0.0272 | 0.0033 | 1.776E-14 |
| rs11613352 | C    | T     | 0.8087  | 0.028  | 0.0039 | 9.397E-14 |
| rs6995541  | G    | A     | 0.3219  | 0.0265 | 0.0037 | 1.343E-12 |
| rs6831256  | G    | A     | 0.409   | 0.0258 | 0.0035 | 1.602E-12 |
| rs1832007  | A    | G     | 0.8681  | 0.0327 | 0.0047 | 1.718E-12 |
| rs645040   | T    | G     | 0.7691  | 0.0293 | 0.004  | 1.83E-12  |
| rs11057408 | G    | T     | 0.6372  | 0.0258 | 0.0035 | 2.049E-12 |
| rs12676857 | C    | T     | 0.1544  | 0.0332 | 0.0046 | 7.291E-12 |
| rs3761445  | A    | G     | 0.6148  | 0.0232 | 0.0034 | 8.062E-12 |
| rs2068888  | G    | A     | 0.5092  | 0.0241 | 0.0034 | 1.682E-11 |
| rs10440120 | C    | A     | 0.8325  | 0.0306 | 0.0044 | 5.343E-11 |
| rs4719841  | G    | A     | 0.3826  | 0.0232 | 0.0034 | 8.864E-11 |
| rs2250802  | A    | G     | 0.6807  | 0.023  | 0.0037 | 1.21E-10  |
| rs2239520  | G    | A     | 0.6266  | 0.0236 | 0.0037 | 4.144E-10 |
| rs7248104  | G    | A     | 0.5831  | 0.0222 | 0.0034 | 5.045E-10 |
| rs749671   | G    | A     | 0.6055  | 0.0211 | 0.0034 | 6.106E-10 |
| rs2665357  | C    | A     | 0.5092  | 0.0212 | 0.0033 | 8.327E-10 |
| rs12748152 | T    | C     | 0.07124 | 0.0372 | 0.0059 | 1.1E-09   |
| rs731839   | G    | A     | 0.3417  | 0.0224 | 0.0036 | 2.651E-09 |
| rs3760627  | C    | T     | 0.4683  | 0.0189 | 0.0034 | 5.293E-09 |
| rs287621   | T    | C     | 0.2704  | 0.0222 | 0.0037 | 7.671E-09 |
| rs4738684  | A    | G     | 0.3522  | 0.0205 | 0.0035 | 8.819E-09 |
| rs8077889  | C    | A     | 0.2441  | 0.0252 | 0.0042 | 9.879E-09 |
| rs10501321 | T    | C     | 0.686   | 0.0216 | 0.0035 | 1.412E-08 |
| rs17513135 | T    | C     | 0.2322  | 0.022  | 0.0039 | 1.633E-08 |
| rs38855    | A    | G     | 0.5264  | 0.0187 | 0.0033 | 2.109E-08 |
| rs3198697  | C    | T     | 0.6174  | 0.0198 | 0.0034 | 2.207E-08 |
| rs719726   | T    | C     | 0.529   | 0.0199 | 0.0035 | 2.486E-08 |
| rs6029143  | C    | T     | 0.94195 | 0.0388 | 0.0071 | 4.933E-08 |

Tabl. 9 Total Cholesterol

| rsID       | EFAL | NEFAL | EAF     | B      | SE     | P-value   |
|------------|------|-------|---------|--------|--------|-----------|
| rs7412     | C    | T     | 0.93404 | 0.3736 | 0.0096 | 1E-200    |
| rs6511720  | G    | T     | 0.90237 | 0.1851 | 0.0059 | 1E-200    |
| rs646776   | T    | C     | 0.7876  | 0.1272 | 0.0042 | 4.77E-187 |
| rs515135   | C    | T     | 0.7823  | 0.1238 | 0.0046 | 6.38E-151 |
| rs11591147 | G    | T     | 0.98285 | 0.3341 | 0.0173 | 8.827E-86 |
| rs6544713  | T    | C     | 0.2942  | 0.0773 | 0.004  | 1.685E-81 |
| rs12916    | C    | T     | 0.4314  | 0.0684 | 0.0036 | 4.547E-74 |
| rs2954029  | A    | T     | 0.5317  | 0.0622 | 0.0035 | 2.421E-65 |
| rs2228603  | C    | T     | 0.92876 | 0.1217 | 0.0069 | 1.049E-62 |
| rs964184   | G    | C     | NA      | 0.1214 | 0.0076 | 2.838E-55 |
| rs1883025  | C    | T     | 0.7573  | 0.0671 | 0.0042 | 5.749E-53 |
| rs10468017 | T    | C     | 0.2757  | 0.0617 | 0.004  | 7.232E-48 |
| rs780093   | T    | C     | 0.4129  | 0.0515 | 0.0036 | 2.591E-42 |
| rs579459   | C    | T     | 0.215   | 0.062  | 0.0044 | 8.828E-42 |
| rs6882076  | C    | T     | 0.6662  | 0.0508 | 0.0037 | 5.354E-41 |
| rs2000999  | A    | G     | 0.1847  | 0.0617 | 0.0044 | 6.804E-41 |
| rs1535     | A    | G     | 0.6372  | 0.0497 | 0.0037 | 8.624E-39 |
| rs9306897  | T    | C     | 0.3034  | 0.0488 | 0.0037 | 7.515E-37 |
| rs9987289  | G    | A     | 0.9248  | 0.0842 | 0.0063 | 1.844E-36 |
| rs247616   | T    | C     | 0.2929  | 0.0499 | 0.004  | 4.47E-32  |
| rs2156552  | T    | A     | 0.8219  | 0.057  | 0.0047 | 1.247E-31 |
| rs7534572  | G    | C     | 0.69    | 0.0629 | 0.0055 | 3.597E-28 |
| rs558971   | G    | A     | 0.5303  | 0.0398 | 0.0036 | 7.025E-28 |
| rs2235367  | G    | A     | 0.4565  | 0.0357 | 0.0035 | 7.219E-25 |
| rs1800961  | C    | T     | 0.9657  | 0.1062 | 0.0101 | 1.342E-24 |
| rs4738684  | A    | G     | 0.3522  | 0.0392 | 0.0037 | 1.116E-23 |
| rs11753995 | A    | G     | 0.1464  | 0.0489 | 0.0048 | 1.839E-23 |
| rs75687619 | T    | G     | 0.02375 | 0.1592 | 0.0153 | 3.609E-22 |
| rs9391858  | G    | A     | 0.1939  | 0.0495 | 0.005  | 7.204E-22 |
| rs7551981  | T    | G     | 0.595   | 0.0358 | 0.0037 | 7.497E-22 |
| rs2073547  | G    | A     | 0.1939  | 0.0456 | 0.0047 | 3.83E-21  |
| rs2642438  | G    | A     | 0.7454  | 0.037  | 0.004  | 1.283E-18 |
| rs2244608  | G    | A     | 0.3391  | 0.0313 | 0.0037 | 9.618E-18 |
| rs6016373  | A    | G     | 0.6266  | 0.0319 | 0.0036 | 1.002E-17 |
| rs3184504  | C    | T     | 0.5343  | 0.0318 | 0.0037 | 1.623E-17 |
| rs7616006  | A    | G     | 0.5554  | 0.0315 | 0.0036 | 8.406E-17 |
| rs12670798 | C    | T     | 0.2243  | 0.0364 | 0.0041 | 9.478E-17 |
| rs2737252  | G    | A     | 0.7441  | 0.0331 | 0.0039 | 1.634E-16 |
| rs2255141  | A    | G     | 0.3193  | 0.0314 | 0.0039 | 6.514E-16 |
| rs3757354  | C    | T     | 0.7902  | 0.0348 | 0.0042 | 2.215E-15 |
| rs2814982  | C    | T     | 0.8931  | 0.0441 | 0.0057 | 3.678E-15 |
| rs11220462 | A    | G     | 0.1425  | 0.0474 | 0.0058 | 5.487E-15 |
| rs8103315  | A    | C     | 0.1359  | 0.0422 | 0.0055 | 5.942E-15 |
| rs6603981  | T    | C     | 0.8061  | 0.0351 | 0.0043 | 7.846E-15 |
| rs633695   | G    | A     | 0.285   | 0.0433 | 0.0058 | 1.054E-14 |
| rs11153594 | C    | T     | 0.6082  | 0.029  | 0.0036 | 1.266E-14 |
| rs10832962 | T    | C     | 0.719   | 0.0315 | 0.0039 | 1.539E-14 |
| rs11802413 | T    | C     | 0.5369  | 0.0287 | 0.0035 | 1.576E-14 |
| rs4988235  | G    | A     | 0.4763  | 0.0308 | 0.004  | 3.975E-14 |
| rs581080   | C    | G     | 0.8206  | 0.0377 | 0.0047 | 1.022E-13 |
| rs7832643  | T    | G     | 0.405   | 0.0289 | 0.0037 | 3.121E-13 |
| rs1800562  | G    | A     | 0.95383 | 0.0565 | 0.0077 | 1.905E-12 |
| rs2287623  | G    | A     | 0.405   | 0.0273 | 0.0036 | 4.085E-12 |
| rs6504872  | T    | C     | 0.4723  | 0.025  | 0.0035 | 6.987E-12 |

Tabl. 9 Total Cholesterol

|             |   |   |         |        |        |           |
|-------------|---|---|---------|--------|--------|-----------|
| rs2315065   | A | C | 0.08707 | 0.1102 | 0.0158 | 1.098E-11 |
| rs11789603  | T | C | 0.08971 | 0.0427 | 0.0062 | 1.439E-11 |
| rs2738459   | A | C | 0.5554  | 0.0387 | 0.0057 | 2.109E-11 |
| rs10904908  | G | A | 0.4538  | 0.025  | 0.0036 | 2.601E-11 |
| rs6573778   | T | C | 0.471   | 0.0263 | 0.0039 | 2.958E-11 |
| rs2277862   | C | T | 0.8681  | 0.0349 | 0.0052 | 5.256E-11 |
| rs6818397   | T | G | 0.4129  | 0.0254 | 0.0039 | 9.51E-11  |
| rs1997243   | G | A | 0.1306  | 0.0332 | 0.005  | 2.719E-10 |
| rs314253    | T | C | 0.6649  | 0.0233 | 0.0037 | 2.808E-10 |
| rs10088180  | A | G | 0.3219  | 0.0228 | 0.004  | 6.018E-10 |
| rs3780181   | A | G | 0.94723 | 0.0442 | 0.0071 | 6.668E-10 |
| rs12412743  | C | T | 0.847   | 0.0298 | 0.0047 | 6.976E-10 |
| rs181360    | T | G | 0.8008  | 0.0278 | 0.0043 | 7.319E-10 |
| rs6709904   | A | G | 0.8865  | 0.0545 | 0.0083 | 8.395E-10 |
| rs11563251  | T | C | 0.1253  | 0.0368 | 0.0059 | 1.266E-09 |
| rs4752805   | G | A | 0.2467  | 0.0251 | 0.0041 | 1.617E-09 |
| rs4530754   | A | G | 0.5818  | 0.0228 | 0.0035 | 1.678E-09 |
| rs4883201   | A | G | 0.8865  | 0.035  | 0.0056 | 1.742E-09 |
| rs11694172  | G | A | 0.2164  | 0.0277 | 0.0041 | 1.951E-09 |
| rs9376090   | T | C | 0.7282  | 0.0254 | 0.004  | 2.595E-09 |
| rs10773003  | A | G | 0.08839 | 0.0369 | 0.0058 | 4.083E-09 |
| rs17526895  | A | G | 0.92216 | 0.042  | 0.0067 | 5.777E-09 |
| rs10900221  | A | G | 0.2731  | 0.0255 | 0.0041 | 7.963E-09 |
| rs4253772   | T | C | 0.1187  | 0.0322 | 0.0058 | 9.852E-09 |
| rs2066714   | C | T | 0.1201  | 0.0442 | 0.0076 | 1.136E-08 |
| rs112201728 | T | C | 0.05805 | 0.0581 | 0.0099 | 1.195E-08 |
| rs7640978   | C | T | 0.8945  | 0.0376 | 0.0066 | 1.658E-08 |
| rs9272775   | C | T | 0.2823  | 0.0317 | 0.0055 | 2.125E-08 |
| rs13315871  | G | A | 0.91953 | 0.0355 | 0.0061 | 3.48E-08  |
| rs2030746   | T | C | 0.3984  | 0.0199 | 0.0037 | 3.603E-08 |
| rs2886232   | T | C | 0.1201  | 0.0358 | 0.0062 | 3.874E-08 |
| rs281393    | C | T | 0.6266  | 0.0322 | 0.0055 | 4.256E-08 |
| rs386003    | T | G | 0.1992  | 0.0344 | 0.0058 | 4.519E-08 |
| rs138777    | A | G | 0.3483  | 0.0214 | 0.0037 | 4.74E-08  |

Supplementary Table 10: Genetic variants associated with fasting glucose

| rsID       | EFAL | NEFAL | EAF   | B      | SE     | P-value     |
|------------|------|-------|-------|--------|--------|-------------|
| rs10830963 | C    | G     | 0.3   | -0.078 | 0.0025 | 1E-200      |
| rs560887   | C    | T     | 0.326 | 0.071  | 0.0025 | 1.4E-178    |
| rs6975024  | T    | C     | 0.2   | -0.061 | 0.0029 | 2.88E-99    |
| rs2191349  | G    | T     | 0.467 | -0.029 | 0.0021 | 1.28E-42    |
| rs1260326  | C    | T     | 0.42  | 0.029  | 0.0021 | 2.17E-41    |
| rs11558471 | A    | G     | 0.252 | 0.029  | 0.0023 | 7.8E-37     |
| rs17168486 | C    | T     | 0.173 | -0.031 | 0.0028 | 3.17E-28    |
| rs4502156  | T    | C     | 0.42  | 0.022  | 0.0021 | 1.38E-25    |
| rs11607883 | G    | A     | 0.469 | 0.021  | 0.0021 | 6.32E-24    |
| rs7903146  | C    | T     | 0.279 | -0.022 | 0.0024 | 2.71E-20    |
| rs174576   | C    | A     | 0.345 | 0.02   | 0.0022 | 1.18E-18    |
| rs11708067 | A    | G     | 0.226 | 0.023  | 0.0026 | 1.3E-18     |
| rs11195502 | C    | T     | 0.075 | 0.032  | 0.0037 | 1.97E-18    |
| rs10811661 | T    | C     | 0.199 | 0.024  | 0.0028 | 5.65E-18    |
| rs1280     | T    | C     | 0.137 | 0.026  | 0.0031 | 8.56E-18    |
| rs4869272  | C    | T     | 0.323 | -0.018 | 0.0022 | 1.02E-15    |
| rs11619319 | A    | G     | 0.212 | -0.02  | 0.0024 | 1.33E-15    |
| rs749067   | C    | T     | 0.376 | -0.017 | 0.0022 | 6.12E-15    |
| rs983309   | G    | T     | 0.097 | -0.026 | 0.0033 | 6.29E-15    |
| rs10814916 | C    | A     | 0.434 | 0.016  | 0.0022 | 2.26E-13    |
| rs6943153  | C    | T     | 0.279 | -0.015 | 0.0022 | 1.63E-12    |
| rs882020   | C    | T     | 0.121 | -0.021 | 0.003  | 3.04E-12    |
| rs17712208 | T    | A     | 0.041 | -0.051 | 0.0074 | 3.22E-12    |
| rs479661   | A    | G     | 0.142 | -0.019 | 0.0028 | 8.56E-12    |
| rs11603334 | G    | A     | 0.129 | 0.019  | 0.0028 | 1.12E-11    |
| rs6113722  | G    | A     | 0.04  | 0.035  | 0.0053 | 2.49E-11    |
| rs16913693 | T    | G     | 0.017 | 0.043  | 0.0066 | 3.51E-11    |
| rs3829109  | G    | A     | 0.345 | 0.017  | 0.0027 | 1.13E-10    |
| rs3783347  | G    | T     | 0.219 | 0.017  | 0.0026 | 1.32E-10    |
| rs2302593  | C    | G     | 0.475 | 0.014  | 0.0023 | 9.26E-10    |
| rs9368222  | C    | A     | 0.281 | -0.014 | 0.0023 | 0.000000001 |
| rs10747083 | A    | G     | 0.25  | 0.013  | 0.0023 | 7.57E-09    |
| rs6072275  | G    | A     | 0.142 | -0.016 | 0.0028 | 1.66E-08    |
| rs7651090  | A    | G     | 0.296 | -0.013 | 0.0023 | 1.75E-08    |
| rs11715915 | C    | T     | 0.274 | 0.012  | 0.0022 | 0.000000049 |

Tabl. 11 Fasting Insulin

| rsID       | EFAL | NEFAL | EAF   | B      | SE     | P-value  |
|------------|------|-------|-------|--------|--------|----------|
| rs1121980  | G    | A     | 0.482 | -0.02  | 0.0025 | 8.36E-16 |
| rs983309   | G    | T     | 0.097 | -0.029 | 0.0038 | 3.81E-14 |
| rs1260326  | C    | T     | 0.42  | 0.019  | 0.0026 | 3.84E-14 |
| rs9884482  | T    | C     | 0.35  | -0.016 | 0.0024 | 1.4E-11  |
| rs7903146  | C    | T     | 0.279 | 0.018  | 0.0028 | 6.13E-11 |
| rs10195252 | C    | T     | 0.442 | -0.016 | 0.0026 | 4.87E-10 |
| rs1167800  | A    | G     | 0.451 | 0.016  | 0.0026 | 2.61E-09 |
| rs2820436  | C    | A     | 0.322 | 0.015  | 0.0026 | 4.36E-09 |
| rs2745353  | T    | C     | 0.45  | 0.014  | 0.0025 | 5.48E-09 |
| rs860598   | A    | G     | 0.136 | 0.018  | 0.0032 | 1.64E-08 |
| rs731839   | A    | G     | 0.341 | -0.014 | 0.0026 | 1.72E-08 |
| rs4865796  | A    | G     | 0.292 | 0.015  | 0.0026 | 2.09E-08 |
| rs2972143  | G    | A     | 0.371 | 0.014  | 0.0026 | 3.15E-08 |
| rs1530559  | A    | G     | 0.403 | 0.014  | 0.0026 | 3.37E-08 |

Supplementary Table 12: Genetic variants associated with body mass index

| rsID       | EFAL | NEFAL | EAF    | B       | SE     | P-value   |
|------------|------|-------|--------|---------|--------|-----------|
| rs1421085  | C    | T     | 0.45   | 0.0803  | 0.003  | 2.17E-158 |
| rs6567160  | C    | T     | 0.2833 | 0.0562  | 0.0035 | 6.684E-59 |
| rs13021737 | A    | G     | 0.125  | -0.0604 | 0.0039 | 5.439E-54 |
| rs13130484 | C    | T     | 0.5667 | -0.0398 | 0.003  | 8.011E-41 |
| rs543874   | G    | A     | 0.2667 | 0.0497  | 0.0037 | 2.287E-40 |
| rs943005   | T    | C     | 0.1    | 0.0444  | 0.0038 | 4.524E-31 |
| rs11030104 | A    | G     | 0.8    | 0.0416  | 0.0037 | 6.658E-30 |
| rs7531118  | T    | C     | 0.3917 | -0.0331 | 0.003  | 1.88E-28  |
| rs7138803  | G    | A     | 0.5583 | -0.032  | 0.003  | 5.115E-26 |
| rs10182181 | A    | G     | 0.5    | -0.0309 | 0.0029 | 8.071E-26 |
| rs3888190  | A    | C     | 0.3583 | 0.0311  | 0.003  | 3.454E-25 |
| rs1516725  | T    | C     | 0.0917 | -0.0448 | 0.0044 | 1.394E-24 |
| rs11672660 | C    | T     | 0.825  | 0.0339  | 0.0038 | 7.911E-19 |
| rs13329567 | T    | C     | 0.2167 | -0.0307 | 0.0035 | 1.526E-18 |
| rs3817334  | C    | T     | 0.55   | -0.0256 | 0.003  | 1.168E-17 |
| rs2112347  | G    | T     | 0.375  | -0.0254 | 0.003  | 1.96E-17  |
| rs7144011  | T    | G     | 0.275  | 0.0274  | 0.0035 | 6.045E-15 |
| rs13078960 | T    | G     | 0.8167 | -0.029  | 0.0038 | 1.423E-14 |
| rs2183825  | C    | T     | 0.2917 | 0.0241  | 0.0032 | 2.223E-14 |
| rs7550711  | T    | C     | 0.0339 | 0.0659  | 0.0087 | 5.059E-14 |
| rs11165643 | C    | T     | 0.425  | -0.0221 | 0.003  | 1.434E-13 |
| rs17066856 | C    | T     | 0.1333 | -0.0371 | 0.005  | 2.003E-13 |
| rs657452   | A    | G     | 0.4167 | 0.0227  | 0.0031 | 2.123E-13 |
| rs12429545 | G    | A     | 0.9    | -0.0324 | 0.0044 | 3.152E-13 |
| rs12286929 | G    | A     | 0.4333 | 0.0211  | 0.0029 | 5.443E-13 |
| rs13107325 | C    | T     | 0.8833 | -0.0472 | 0.0066 | 1.064E-12 |
| rs7903146  | T    | C     | 0.25   | -0.0235 | 0.0033 | 1.103E-12 |
| rs1016287  | T    | C     | 0.325  | 0.0228  | 0.0033 | 4.355E-12 |
| rs10840100 | G    | A     | 0.725  | 0.0206  | 0.003  | 6.666E-12 |
| rs2060604  | T    | C     | 0.5583 | 0.0203  | 0.003  | 9.46E-12  |
| rs10132280 | A    | C     | 0.3333 | -0.0221 | 0.0033 | 1.401E-11 |
| rs17094222 | C    | T     | 0.2083 | 0.0249  | 0.0037 | 2.186E-11 |
| rs12448257 | G    | A     | 0.775  | -0.0246 | 0.0037 | 3.898E-11 |
| rs17381664 | C    | T     | 0.425  | 0.0201  | 0.0031 | 4.568E-11 |
| rs7599312  | G    | A     | 0.7083 | 0.0214  | 0.0033 | 4.73E-11  |
| rs9926784  | T    | C     | 0.7917 | 0.0249  | 0.0038 | 8.548E-11 |
| rs2365389  | C    | T     | 0.6583 | 0.0195  | 0.003  | 1.346E-10 |
| rs9579083  | G    | C     | 0.7667 | -0.0295 | 0.0046 | 1.426E-10 |
| rs16851483 | G    | T     | 0.9083 | -0.0478 | 0.0075 | 1.85E-10  |
| rs1167827  | A    | G     | 0.4583 | -0.02   | 0.0031 | 1.975E-10 |
| rs10733682 | A    | G     | 0.425  | 0.0188  | 0.003  | 2.455E-10 |
| rs6457796  | T    | C     | 0.7417 | -0.0209 | 0.0033 | 2.535E-10 |
| rs12940622 | A    | G     | 0.4583 | -0.0183 | 0.0029 | 3.636E-10 |
| rs879620   | C    | T     | 0.4083 | -0.0244 | 0.0039 | 3.939E-10 |
| rs1928295  | C    | T     | 0.425  | -0.0182 | 0.0029 | 4.318E-10 |
| rs2820292  | A    | C     | 0.4917 | -0.0181 | 0.0029 | 5.452E-10 |
| rs4889606  | G    | A     | 0.3583 | -0.0187 | 0.003  | 6.58E-10  |
| rs6804842  | A    | G     | 0.425  | -0.0183 | 0.003  | 8.016E-10 |
| rs13191362 | A    | G     | 0.8    | 0.0285  | 0.0047 | 1.092E-09 |
| rs9540493  | G    | A     | 0.55   | -0.0182 | 0.0031 | 3.952E-09 |
| rs1528435  | T    | C     | 0.5833 | 0.0175  | 0.003  | 4.774E-09 |
| rs17001654 | C    | G     | 0.8417 | -0.0304 | 0.0052 | 5.031E-09 |
| rs11727676 | C    | T     | 0.075  | -0.0365 | 0.0063 | 6.247E-09 |
| rs4740619  | T    | C     | 0.5333 | 0.017   | 0.0029 | 6.356E-09 |

Tabl. 12 BMI

|            |   |   |        |         |        |           |
|------------|---|---|--------|---------|--------|-----------|
| rs9374842  | T | C | 0.7417 | 0.0196  | 0.0034 | 7.198E-09 |
| rs17724992 | A | G | 0.6917 | 0.0196  | 0.0034 | 7.787E-09 |
| rs7715256  | G | T | 0.45   | 0.0168  | 0.0029 | 8.851E-09 |
| rs12986742 | C | T | 0.5    | 0.0207  | 0.0036 | 8.924E-09 |
| rs11057405 | A | G | 0.0917 | -0.0304 | 0.0053 | 1.22E-08  |
| rs2890652  | T | C | 0.875  | -0.0279 | 0.0049 | 1.242E-08 |
| rs7899106  | A | G | 0.95   | -0.0379 | 0.0067 | 1.269E-08 |
| rs2033529  | G | A | 0.2583 | 0.0183  | 0.0032 | 1.449E-08 |
| rs9304665  | A | T | 0.7    | 0.0243  | 0.0043 | 1.594E-08 |
| rs2836754  | C | T | 0.65   | 0.0169  | 0.003  | 1.605E-08 |
| rs891389   | C | T | 0.675  | -0.0209 | 0.0037 | 1.617E-08 |
| rs6477694  | C | T | 0.3583 | 0.0169  | 0.003  | 1.705E-08 |
| rs1000940  | G | A | 0.225  | 0.0184  | 0.0033 | 1.812E-08 |
| rs14810    | C | G | 0.325  | -0.0183 | 0.0033 | 1.923E-08 |
| rs3849570  | A | C | 0.3667 | 0.0183  | 0.0033 | 1.933E-08 |
| rs6713510  | A | G | 0.4833 | 0.0164  | 0.0029 | 1.974E-08 |
| rs6091540  | C | T | 0.725  | 0.0185  | 0.0033 | 2.138E-08 |
| rs977747   | T | G | 0.4667 | 0.0168  | 0.003  | 2.182E-08 |
| rs1441264  | A | G | 0.55   | 0.0172  | 0.0031 | 2.959E-08 |
| rs17203016 | G | A | 0.2    | 0.0211  | 0.0038 | 3.406E-08 |
| rs2176598  | T | C | 0.2    | 0.0185  | 0.0033 | 3.469E-08 |
| rs13201877 | A | G | 0.9167 | -0.0236 | 0.0043 | 4.285E-08 |
| rs3736485  | A | G | 0.425  | 0.016   | 0.0029 | 4.524E-08 |
| rs3800229  | T | G | 0.6917 | 0.0175  | 0.0032 | 4.95E-08  |
| rs1460676  | T | C | 0.7833 | -0.0209 | 0.0038 | 4.978E-08 |



Supplementary Table 13: Genetic variants associated with Waist Hip Ratio adjusted Body mass index

| rsID       | EFAL | NEFAL | EAF    | B      | SE     | P-value     |
|------------|------|-------|--------|--------|--------|-------------|
| rs1421085  | C    | T     | 0.45   | 0.043  | 0.0033 | 4.3E-38     |
| rs9491696  | G    | C     | 0.525  | 0.037  | 0.0032 | 1.4E-30     |
| rs998584   | A    | C     | 0.475  | 0.029  | 0.0036 | 4.8E-15     |
| rs1294410  | C    | T     | 0.625  | 0.025  | 0.0033 | 2E-14       |
| rs1106529  | G    | A     | 0.275  | -0.028 | 0.0038 | 2.2E-13     |
| rs13424740 | T    | C     | 0.5333 | 0.024  | 0.0032 | 2.6E-13     |
| rs459193   | A    | G     | 0.2167 | 0.027  | 0.0037 | 3.4E-13     |
| rs10783615 | G    | A     | 0.1333 | 0.034  | 0.0046 | 3.7E-13     |
| rs1563355  | T    | C     | 0.3136 | -0.031 | 0.0044 | 1.7E-12     |
| rs11663816 | C    | T     | 0.3167 | 0.026  | 0.0037 | 3.1E-12     |
| rs3786897  | G    | A     | 0.4083 | 0.022  | 0.0033 | 2.5E-11     |
| rs10842708 | G    | A     | 0.1833 | 0.024  | 0.0036 | 3.1E-11     |
| rs10245353 | A    | C     | 0.1833 | 0.027  | 0.0041 | 3.5E-11     |
| rs2371767  | G    | C     | 0.7917 | 0.024  | 0.0037 | 1.2E-10     |
| rs1128249  | G    | T     | 0.5583 | 0.02   | 0.0033 | 7.8E-10     |
| rs12549058 | G    | T     | 0.0583 | 0.037  | 0.006  | 8.3E-10     |
| rs17451107 | T    | C     | 0.625  | 0.021  | 0.0034 | 1.2E-09     |
| rs1440372  | C    | T     | 0.7417 | 0.022  | 0.0036 | 2.7E-09     |
| rs7973683  | C    | A     | 0.6167 | 0.02   | 0.0034 | 3.3E-09     |
| rs4823006  | A    | G     | 0.5333 | 0.019  | 0.0033 | 3.3E-09     |
| rs714515   | G    | A     | 0.4583 | 0.019  | 0.0033 | 5.9E-09     |
| rs6736025  | G    | T     | 0.5917 | 0.024  | 0.0042 | 7.2E-09     |
| rs16996700 | T    | C     | 0.7    | 0.021  | 0.0036 | 8.8E-09     |
| rs2972164  | C    | T     | 0.5    | 0.019  | 0.0033 | 0.00000001  |
| rs2287019  | C    | T     | 0.85   | 0.025  | 0.0044 | 0.000000011 |
| rs6743060  | C    | A     | 0.125  | -0.025 | 0.0043 | 0.000000015 |
| rs13130484 | C    | T     | 0.5667 | -0.019 | 0.0033 | 0.000000015 |
| rs4929927  | G    | A     | 0.725  | 0.019  | 0.0033 | 0.000000016 |
| rs4640244  | G    | A     | 0.375  | 0.02   | 0.0037 | 0.000000003 |
| rs879048   | A    | C     | 0.8    | 0.022  | 0.004  | 0.000000036 |
| rs2398893  | A    | G     | 0.6833 | 0.02   | 0.0036 | 0.00000004  |

Tabl. 14 Apolipoprotein A

| rsID        | EFAL | NEFAL | EAF      | B         | SE       | P-value  |
|-------------|------|-------|----------|-----------|----------|----------|
| rs247617    | A    | C     | 0.285998 | 0.197243  | 0.011688 | 7.9E-63  |
| rs261291    | C    | T     | 0.374904 | 0.144314  | 0.010905 | 2.58E-39 |
| rs6507939   | C    | A     | 0.838753 | 0.108424  | 0.014268 | 5.03E-14 |
| rs11632618  | A    | G     | 0.061853 | 0.174133  | 0.024085 | 7.76E-13 |
| rs174594    | A    | C     | 0.58921  | 0.071714  | 0.010504 | 1.32E-11 |
| rs73424577  | G    | A     | 0.035619 | 0.186041  | 0.030161 | 9.78E-10 |
| rs1883025   | T    | C     | 0.194349 | -0.079839 | 0.013321 | 2.86E-09 |
| rs144064722 | G    | A     | 0.025304 | 0.203723  | 0.035039 | 8.3E-09  |
| rs75835816  | C    | G     | 0.019619 | -0.22095  | 0.038801 | 1.67E-08 |
| rs1461729   | G    | A     | 0.861933 | 0.086363  | 0.015193 | 1.77E-08 |
| rs4860951   | T    | A     | 0.351356 | 0.073728  | 0.013224 | 3.29E-08 |

Supplementary Table 15: Genetic variants associated with apolipoprotein B

| rsID        | EFAL | NEFAL | EAF      | B         | SE       | P-value  |
|-------------|------|-------|----------|-----------|----------|----------|
| rs7412      | T    | C     | 0.055855 | -0.427553 | 0.025979 | 4.39E-59 |
| rs11591147  | T    | G     | 0.031101 | -0.437941 | 0.035298 | 2.5E-34  |
| rs142130958 | A    | G     | 0.105527 | -0.199648 | 0.016743 | 7.78E-32 |
| rs964184    | C    | G     | 0.861008 | -0.165767 | 0.014266 | 2.58E-30 |
| rs1367117   | A    | G     | 0.287972 | 0.108852  | 0.011191 | 9.99E-22 |
| rs10056811  | A    | G     | 0.341411 | 0.085783  | 0.010571 | 1.35E-15 |
| rs190934192 | A    | G     | 0.023998 | -0.319724 | 0.040849 | 1.3E-14  |
| rs3005923   | A    | G     | 0.027652 | -0.282948 | 0.03695  | 4.73E-14 |
| rs629301    | T    | G     | 0.779917 | 0.090052  | 0.012193 | 3.56E-13 |
| rs2980875   | G    | A     | 0.483896 | -0.069675 | 0.009993 | 6.68E-12 |
| rs1260326   | C    | T     | 0.638553 | -0.066785 | 0.010393 | 2.51E-10 |
| rs150617279 | A    | T     | 0.110384 | -0.112384 | 0.017688 | 3.97E-10 |
| rs4722043   | C    | G     | 0.417089 | -0.065942 | 0.010669 | 1.17E-09 |
| rs6756629   | A    | G     | 0.078334 | -0.113253 | 0.018566 | 1.9E-09  |
| rs635634    | T    | C     | 0.198293 | 0.073971  | 0.012612 | 7.71E-09 |
| rs115849089 | A    | G     | 0.106662 | -0.099572 | 0.017126 | 1.04E-08 |
| rs1883711   | C    | G     | 0.056795 | 0.144092  | 0.02526  | 1.95E-08 |
| rs144064722 | G    | A     | 0.025304 | 0.199001  | 0.035059 | 2.29E-08 |
| rs1081105   | C    | A     | 0.020011 | 0.222868  | 0.039281 | 2.32E-08 |
| rs182695896 | C    | A     | 0.019349 | 0.236546  | 0.041781 | 2.49E-08 |
| rs2495477   | G    | A     | 0.418981 | -0.061897 | 0.011013 | 3.14E-08 |

**Supplementary Table 16: Genetic variants associated with cigarettes per day**

| rsID       | EFAL | NEFAL | EAF    | B      | SE     | P-value   |
|------------|------|-------|--------|--------|--------|-----------|
| rs12914385 | T    | C     | 0.3965 | 1.0235 | 0.0828 | 4.229E-35 |
